# Supplementary material for: Unique catalytic role of intermolecular electric fields that emanate from Lewis acids in a ring closing carbonyl olefin metathesis reaction
Source: Royal Society of Chemistry journal article supplement (doi:10.1039/d4cp04879b), 2025-01-01
Supplement: d4cp04879b1.pdf [file d4cp04879b1.pdf]

*Electronic Supplementary Information for*

**Unique Catalytic Role of Intermolecular Electric Fields that  
Emanate from the Lewis Acids in a Ring Closing Carbonyl Olefin  
Metathesis Reaction**

Lopita Swain<sup>a</sup>, Karthik Gopakumar<sup>a</sup>, Rajeev Ramanan\*<sup>a</sup>

<sup>a</sup> Department of Chemistry, National Institute of Technology Rourkela, Odisha,  
769008, India.

Corresponding Author: Rajeev Ramanan ([rrajeev@nitrkl.ac.in](mailto:rrajeev@nitrkl.ac.in))

## Table of Contents

| 1. List of Tables                                          |                                                                                                                                 | Page No. |
|------------------------------------------------------------|---------------------------------------------------------------------------------------------------------------------------------|----------|
| <b>Table S1</b>                                            | Intermolecular EF in a.u. for <b>RC-LA</b> in ring-closing carbonyl-olefin metathesis (RCCOM) reaction with distance            | S3       |
| <b>Table S2</b>                                            | Energies of <b>RC-LA</b> , <b>TS1-LA</b> , and <b>TS2-LA</b>                                                                    | S3       |
| <b>Table S3</b>                                            | Relative energies of <b>RC</b> , <b>TS1</b> , and <b>TS2</b>                                                                    | S4       |
| <b>Table S4</b>                                            | The dipole moment of <b>RC</b> , <b>TS1</b> , and <b>TS2</b>                                                                    | S5       |
| <b>Table S5</b>                                            | Energies of <b>RC</b> , <b>TS1</b> , and <b>TS2</b>                                                                             | S6       |
| <b>Table S6</b>                                            | The NBO charges of O <sub>d</sub> and C <sub>a</sub> -atom in <b>RC</b> , <b>TS1</b> , and <b>TS2</b> with oriented external EF | S7       |
| <b>Table S7</b>                                            | The LUMO energy of carbonyl (C=O) and HOMO energy of ene (C=C) for <b>RC</b> with oriented external EF                          | S8       |
| <b>Table S8</b>                                            | The energies of <b>RC</b> , <b>TSs</b> , <b>Is</b> , and <b>PD</b> for <b>RCCOM</b>                                             | S8       |
| 2. List of Figures                                         |                                                                                                                                 |          |
| <b>Fig. S1</b>                                             | Details of the Calculation of Intermolecular EF                                                                                 | S9       |
| <b>Fig. S2</b>                                             | The energy profile for AlCl <sub>3</sub> catalysed the RCCOM reaction                                                           | S10      |
| <b>Fig. S3</b>                                             | The relationship between the energy barrier ( $\Delta E$ ) and distance of LA with O-atom of <b>RC</b>                          | S10      |
| <b>Fig. S4</b>                                             | The charge difference in atoms in the presence of oriented external EFs                                                         | S11      |
| <b>Fig. S5</b>                                             | The relation between the bond distance and the oriented external EF                                                             | S12      |
| <b>Fig. S6</b>                                             | Details of the fragmentation of reactants into the carbonyl and ene groups                                                      | S12      |
| <b>3. Full citation of Gaussian 16</b>                     |                                                                                                                                 | S13      |
| <b>4. Cartesian coordinate of the optimized geometries</b> |                                                                                                                                 | S13      |

**Table S1.** Intermolecular electric fields (EFs) in a.u. for Lewis acid (LA) attached to reactant complex (**RC-LA**) in ring-closing carbonyl-olefin metathesis (RCCOM) reaction as a function of distances<sup>-a</sup>

| Distance(Å) | RC-LA<br>(AlCl <sub>3</sub> ) | RC-LA<br>([AlCl <sub>2</sub> ] <sup>+</sup> [SbF <sub>6</sub> ] <sup>-</sup> ) |
|-------------|-------------------------------|--------------------------------------------------------------------------------|
| d           | -0.0658                       | -0.0507                                                                        |
| d+0.25      | -0.0475                       | -0.0361                                                                        |
| d+0.50      | -0.0355                       | -0.0262                                                                        |
| d+0.75      | -0.0272                       | -0.0192                                                                        |
| d+1.00      | -0.0213                       | -0.0141                                                                        |

<sup>-a</sup>The ‘d’ is the distance between the aluminium (Al) of the LA and the carbonyl oxygen (O<sub>d</sub>) of the reactant complex (**RC**). (0.001 a.u. = 51.4 mV/Å)

**Table S2.** Energies of **RC-LA**, transition states **TS1-LA**, and **TS2-LA** for carbonyl-ene and [2+2] cycloaddition reaction with distances<sup>-a</sup>

| Distance(Å) | RC-LA      | TS1-LA     | TS2-LA     | $\Delta E_1 =$<br>[E <sub>(TS1-LA)</sub> - E <sub>(RC-LA)</sub> ] | $\Delta E_2 =$<br>[E <sub>(TS2-LA)</sub> - E <sub>(RC-LA)</sub> ] |
|-------------|------------|------------|------------|-------------------------------------------------------------------|-------------------------------------------------------------------|
| d           | -3620.2804 | -3620.2593 | -3620.2585 | 13.27                                                             | 13.73                                                             |
| d+0.25      | -3620.2662 | -3620.2444 | -3620.2402 | 13.65                                                             | 16.28                                                             |
| d+0.50      | -3620.2435 | -3620.2202 | -3620.2106 | 14.61                                                             | 20.61                                                             |
| d+0.75      | -3620.2237 | -3620.1976 | -3620.1830 | 16.35                                                             | 25.54                                                             |
| d+1.00      | -3620.2081 | -3620.1794 | -3620.1609 | 18.02                                                             | 29.61                                                             |

<sup>-a</sup>The ‘d’ is the distance between Al of the LA ([AlCl<sub>2</sub>]<sup>+</sup>[SbF<sub>6</sub>]<sup>-</sup>) and the carbonyl oxygen (O<sub>d</sub>) of the **RC**.  $\Delta E_1$  energy barrier for carbonyl-ene reaction and  $\Delta E_2$  energy barrier for [2+2] cycloaddition reaction. Energies of **RCs** and transition states (**TSs**) are provided in Hartree and  $\Delta E$  energies are given in kcal/mol.

**Table S3.** The relative energy changes of **RC**, **TS1**, and **TS2**, compared to their corresponding zero-field energies ( $\Delta$ **RC**,  $\Delta$ **TS1**, and  $\Delta$ **TS2**), in kcal/mol for carbonyl-ene and [2+2] cycloaddition reaction with oriented external EFs (0.001 a.u. = 51.4 mV/Å)

| <b>Field (a.u.)</b> | $\Delta$ <b>RC</b> | $\Delta$ <b>TS1</b> | $\Delta$ <b>TS2</b> |
|---------------------|--------------------|---------------------|---------------------|
| 0.020               | -26.89             | -21.47              | -3.71               |
| 0.018               | -21.36             | -16.17              | 0.12                |
| 0.016               | -16.48             | -11.59              | 3.16                |
| 0.014               | -12.22             | -7.71               | 5.40                |
| 0.012               | -8.60              | -4.54               | 6.87                |
| 0.010               | -5.60              | -2.06               | 7.58                |
| 0.008               | -3.23              | -0.27               | 7.54                |
| 0.006               | -1.48              | 0.82                | 6.75                |
| 0.004               | -0.36              | 1.23                | 5.23                |
| 0.002               | 0.13               | 0.96                | 2.98                |
| 0                   | 0.00               | 0.00                | 0.00                |
| -0.002              | -0.77              | -1.64               | -3.70               |
| -0.004              | -2.18              | -3.98               | -8.12               |
| -0.006              | -4.25              | -7.00               | -13.25              |
| -0.008              | -6.97              | -10.71              | -19.11              |
| -0.010              | -10.37             | -15.12              | -25.68              |
| -0.012              | -14.46             | -20.23              | -32.96              |
| -0.014              | -19.25             | -26.04              | -40.97              |
| -0.016              | -24.78             | -32.57              | -49.70              |
| -0.018              | -31.07             | -39.82              | -59.16              |
| -0.020              | -38.15             | -47.80              | -69.36              |

**Table S4.** The **RC**, **TS1**, and **TS2** dipole moments in Debye for carbonyl-ene and [2+2] cycloaddition reaction with oriented external EFs (0.001 a.u. = 51.4 mV/Å)

| <b>Field (a.u.)</b> | <b>RC</b> | <b>TS1</b> | <b>TS2</b> |
|---------------------|-----------|------------|------------|
| 0.020               | -11.83    | -11.45     | -8.61      |
| 0.018               | -10.53    | -10.00     | -6.95      |
| 0.016               | -9.25     | -8.56      | -5.33      |
| 0.014               | -7.97     | -7.13      | -3.75      |
| 0.012               | -6.70     | -5.72      | -2.20      |
| 0.010               | -5.43     | -4.32      | -0.67      |
| 0.008               | -4.17     | -2.92      | 0.84       |
| 0.006               | -2.90     | -1.52      | 2.34       |
| 0.004               | -1.63     | -0.13      | 3.82       |
| 0.002               | -0.36     | 1.25       | 5.30       |
| 0                   | 0.91      | 2.64       | 6.76       |
| -0.002              | 2.21      | 4.03       | 8.22       |
| -0.004              | 3.51      | 5.42       | 9.68       |
| -0.006              | 4.84      | 6.81       | 11.13      |
| -0.008              | 6.19      | 8.22       | 12.57      |
| -0.010              | 7.57      | 9.63       | 14.02      |
| -0.012              | 8.98      | 11.05      | 15.48      |
| -0.014              | 10.44     | 12.49      | 16.94      |
| -0.016              | 11.95     | 13.94      | 18.41      |
| -0.018              | 13.52     | 15.42      | 19.91      |
| -0.020              | 15.16     | 16.92      | 21.43      |

**Table S5.** Energies of **RC**, **TS1**, and **TS2** in Hartree for carbonyl-ene and [2+2] cycloaddition reaction with oriented external EFs. Barrier energies ( $\Delta E$ ) are in kcal/mol

| Field (a.u.) | RC         | TS1        | TS2        | $\Delta E = (E_{TS1} - E_{RC})$ | $\Delta E = (E_{TS2} - E_{RC})$ |
|--------------|------------|------------|------------|---------------------------------|---------------------------------|
| 0.020        | -1617.2707 | -1617.2142 | -1617.1557 | 35.46                           | 72.16                           |
| 0.018        | -1617.2619 | -1617.2058 | -1617.1496 | 35.24                           | 70.47                           |
| 0.016        | -1617.2542 | -1617.1985 | -1617.1448 | 34.93                           | 68.62                           |
| 0.014        | -1617.2474 | -1617.1923 | -1617.1412 | 34.55                           | 66.61                           |
| 0.012        | -1617.2416 | -1617.1872 | -1617.1389 | 34.11                           | 64.46                           |
| 0.010        | -1617.2368 | -1617.1833 | -1617.1377 | 33.59                           | 62.17                           |
| 0.008        | -1617.2330 | -1617.1804 | -1617.1378 | 33.00                           | 59.76                           |
| 0.006        | -1617.2303 | -1617.1787 | -1617.1391 | 32.35                           | 57.22                           |
| 0.004        | -1617.2285 | -1617.1780 | -1617.1415 | 31.64                           | 54.58                           |
| 0.002        | -1617.2277 | -1617.1785 | -1617.1451 | 30.87                           | 51.83                           |
| 0            | -1617.2279 | -1617.1800 | -1617.1498 | 30.04                           | 48.98                           |
| -0.002       | -1617.2291 | -1617.1826 | -1617.1557 | 29.17                           | 46.05                           |
| -0.004       | -1617.2314 | -1617.1863 | -1617.1628 | 28.25                           | 43.05                           |
| -0.006       | -1617.2347 | -1617.1912 | -1617.1710 | 27.29                           | 39.97                           |
| -0.008       | -1617.2390 | -1617.1971 | -1617.1803 | 26.30                           | 36.84                           |
| -0.010       | -1617.2444 | -1617.2041 | -1617.1908 | 25.29                           | 33.67                           |
| -0.012       | -1617.2509 | -1617.2122 | -1617.2024 | 24.27                           | 30.47                           |
| -0.014       | -1617.2586 | -1617.2215 | -1617.2151 | 23.26                           | 27.27                           |
| -0.016       | -1617.2674 | -1617.2319 | -1617.2290 | 22.26                           | 24.07                           |
| -0.018       | -1617.2774 | -1617.2435 | -1617.2441 | 21.30                           | 20.89                           |
| -0.020       | -1617.2887 | -1617.2562 | -1617.2604 | 20.39                           | 17.77                           |

**Table S6.** The NBO charges of the carbonyl oxygen-atoms ( $O_d$ ) and the ene carbon-atoms ( $C_a$ ) in **RC**, **TS1**, and **TS2** with oriented external EFs ( $0.001 \text{ a.u.} = 51.4 \text{ mV/\AA}$ )

| Field (a.u.) | $O_d$ -RC | $C_a$ -RC | $O_d$ -TS1 | $C_a$ -TS1 | $O_d$ -TS2 | $C_a$ -TS2 |
|--------------|-----------|-----------|------------|------------|------------|------------|
| 0.020        | -0.489    | -0.032    | -0.575     | 0.039      | -0.615     | 0.377      |
| 0.018        | -0.497    | -0.028    | -0.587     | 0.051      | -0.635     | 0.395      |
| 0.016        | -0.504    | -0.024    | -0.598     | 0.063      | -0.655     | 0.412      |
| 0.014        | -0.511    | -0.020    | -0.609     | 0.075      | -0.674     | 0.428      |
| 0.012        | -0.519    | -0.015    | -0.620     | 0.086      | -0.693     | 0.443      |
| 0.010        | -0.526    | -0.010    | -0.631     | 0.098      | -0.711     | 0.459      |
| 0.008        | -0.533    | -0.005    | -0.642     | 0.111      | -0.728     | 0.475      |
| 0.006        | -0.541    | -0.000    | -0.653     | 0.122      | -0.745     | 0.489      |
| 0.004        | -0.548    | 0.005     | -0.663     | 0.133      | -0.761     | 0.503      |
| 0.002        | -0.555    | 0.010     | -0.674     | 0.144      | -0.777     | 0.516      |
| 0            | -0.563    | 0.015     | -0.684     | 0.155      | -0.792     | 0.528      |
| -0.002       | -0.571    | 0.021     | -0.695     | 0.166      | -0.805     | 0.540      |
| -0.004       | -0.578    | 0.027     | -0.705     | 0.177      | -0.819     | 0.551      |
| -0.006       | -0.586    | 0.034     | -0.715     | 0.187      | -0.832     | 0.560      |
| -0.008       | -0.594    | 0.041     | -0.726     | 0.198      | -0.844     | 0.569      |
| -0.010       | -0.603    | 0.048     | -0.736     | 0.208      | -0.854     | 0.577      |
| -0.012       | -0.612    | 0.056     | -0.746     | 0.218      | -0.864     | 0.584      |
| -0.014       | -0.621    | 0.065     | -0.756     | 0.228      | -0.873     | 0.590      |
| -0.016       | -0.631    | 0.075     | -0.765     | 0.237      | -0.881     | 0.595      |
| -0.018       | -0.641    | 0.085     | -0.775     | 0.247      | -0.888     | 0.599      |
| -0.020       | -0.652    | 0.097     | -0.785     | 0.256      | -0.891     | 0.603      |

**Table S7.** The lowest unoccupied molecular orbital (LUMO) energies of carbonyl (C=O) and highest occupied molecular orbital (HOMO) energies of ene (C=C) for **RC** with oriented external EFs. Energies are in eV (0.001 a.u. = 51.4 mV/Å)

| Field (a.u.) | LUMO(C=O) | HOMO(C=C) | LUMO(C=O) – HOMO(C=C) |
|--------------|-----------|-----------|-----------------------|
| 0.020        | -0.1778   | -0.3099   | 0.1771                |
| 0.018        | -0.1757   | -0.2982   | 0.1695                |
| 0.016        | -0.1733   | -0.2866   | 0.1617                |
| 0.014        | -0.1707   | -0.2749   | 0.1538                |
| 0.012        | -0.1680   | -0.2633   | 0.1458                |
| 0.010        | -0.1652   | -0.2517   | 0.1377                |
| 0.008        | -0.1624   | -0.2402   | 0.1295                |
| 0.006        | -0.1596   | -0.2287   | 0.1212                |
| 0.004        | -0.1584   | -0.2172   | 0.1129                |
| 0.002        | -0.1624   | -0.2057   | 0.1045                |
| 0            | -0.1664   | -0.1943   | 0.0960                |
| -0.002       | -0.1704   | -0.1829   | 0.0874                |
| -0.004       | -0.1744   | -0.1716   | 0.0787                |
| -0.006       | -0.1785   | -0.1603   | 0.0700                |
| -0.008       | -0.1826   | -0.1491   | 0.0612                |
| -0.010       | -0.1867   | -0.1378   | 0.0524                |
| -0.012       | -0.1908   | -0.1267   | 0.0434                |
| -0.014       | -0.1947   | -0.1155   | 0.0344                |
| -0.016       | -0.1960   | -0.1044   | 0.0254                |
| -0.018       | -0.1947   | -0.0934   | 0.0163                |
| -0.020       | -0.1932   | -0.0824   | 0.0071                |

**Table S8.** The energies of **RC**, **TSs**, intermediates (**I**s), and product (**PD**) for RCCOM in Hartree at the B2 level of theory

|            | With ([AlCl <sub>2</sub> ] <sup>+</sup> [SbF <sub>6</sub> ] <sup>-</sup> ) | With [AlCl <sub>3</sub> ] | Pristine reaction |
|------------|----------------------------------------------------------------------------|---------------------------|-------------------|
| <b>RC</b>  | -3620.2816                                                                 | -3240.6512                | -1617.2279        |
| <b>TS1</b> | -3620.2589                                                                 | -3240.6259                | -1617.1800        |
| <b>TS2</b> | -3620.2586                                                                 | -3240.6239                | -1617.1498        |
| <b>I1</b>  | -3620.2719                                                                 | -3240.6429                | -1617.2243        |
| <b>TS3</b> | -3620.2455                                                                 | -3240.6125                | -1617.1375        |
| <b>I2</b>  | -3620.2724                                                                 | -3240.6415                | -1617.2127        |
| <b>TS4</b> | -3620.2584                                                                 | -3240.6254                | -1617.1434        |
| <b>PD</b>  | -3620.2876                                                                 | -3240.6579                | -1617.2359        |



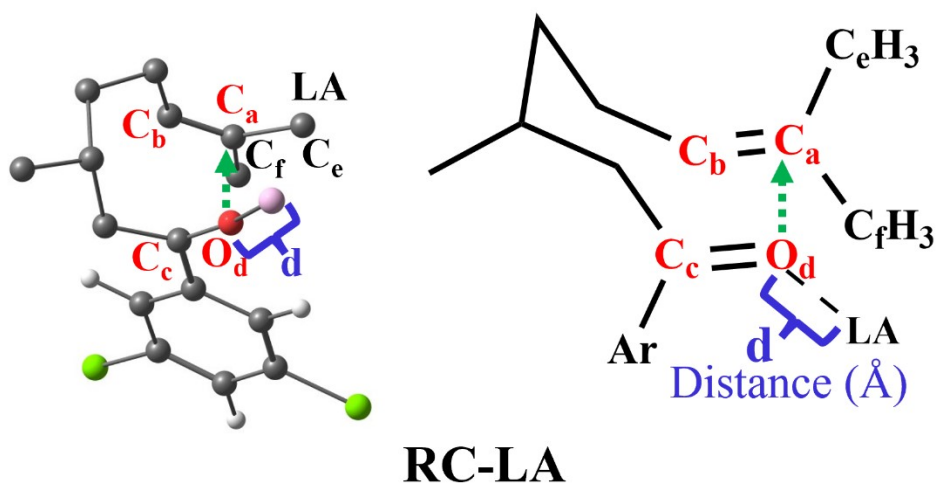

**Fig. S1** Details of the calculation of intermolecular EF and direction in **RC**.

The intermolecular EF is projected along the  $O_d$  to  $C_a$  direction, which is taken as the reaction axis as shown in Fig. S1. We used TITAN code to calculate the intermolecular electric field. TITAN determines the intermolecular EF between two points using Coulomb's law, treating the LA as a collection of point charges.<sup>[46]</sup> Following the TITAN manual, we assigned  $O_d$  as atom 1 and  $C_a$  as atom 2 to define the EF direction. Next, we identified the atoms corresponding to the LA to calculate the EF. The necessary inputs, including NBO charges and atomic distances, were used to compute the field as described in TITAN manual.

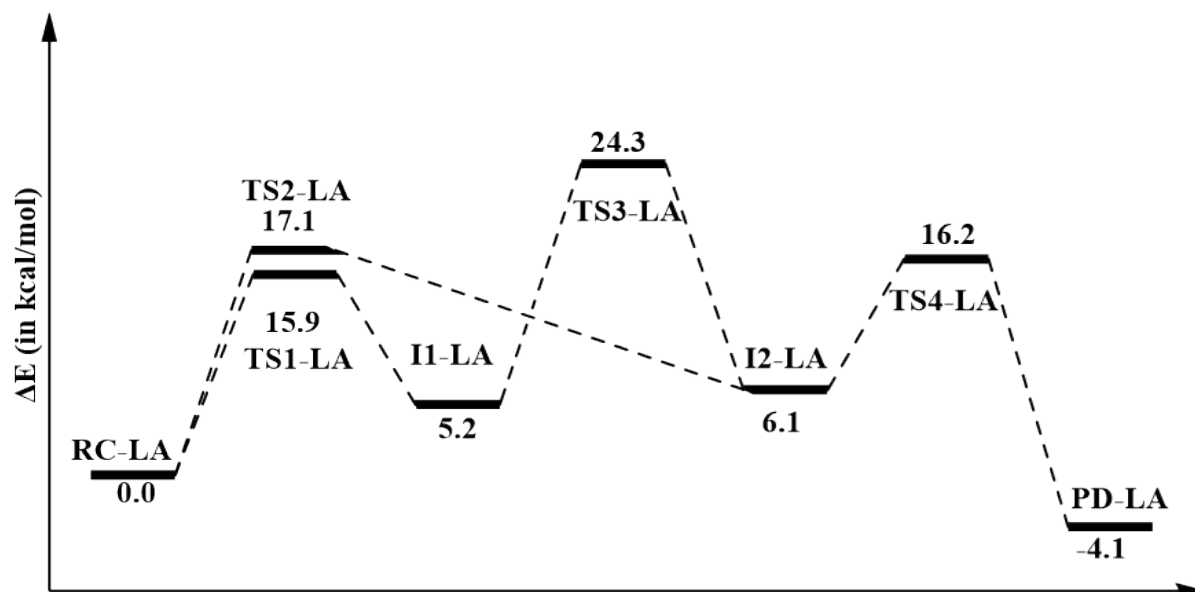

**Fig. S2** Energy profile for the LA ( $\text{AlCl}_3$ ) catalyzed RCCOM reaction.

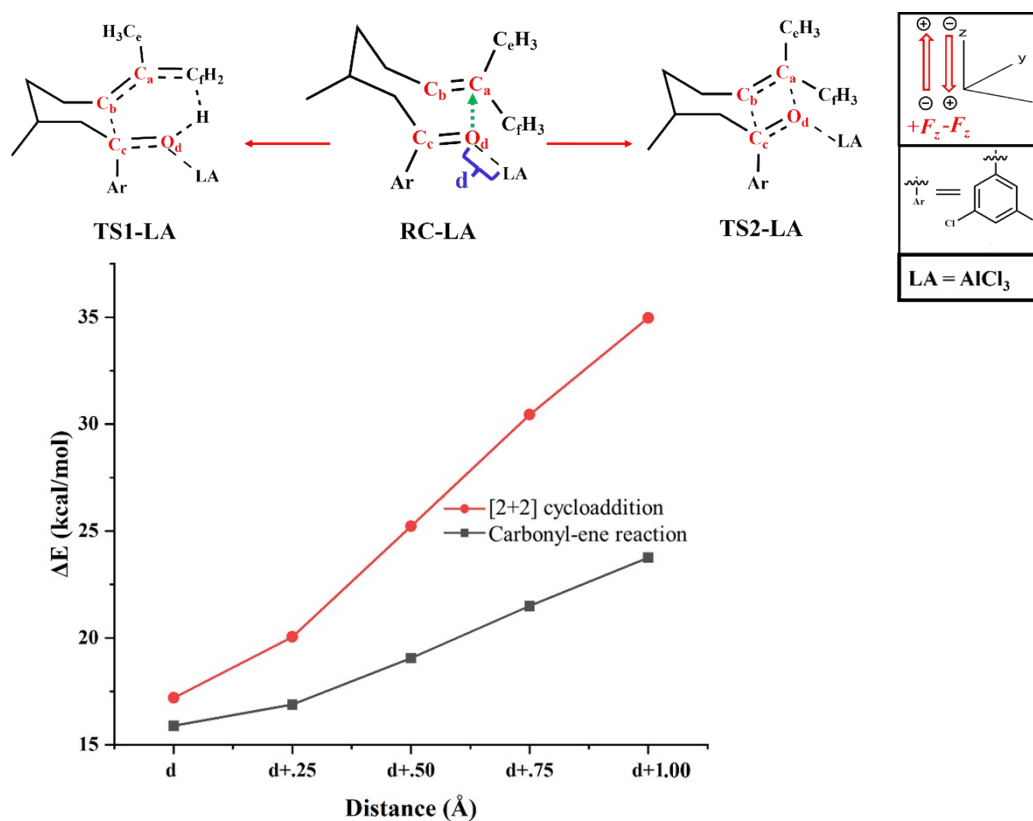

**Fig. S3** The relationship between the Energy barrier ( $\Delta E$ ) and distance.  $\Delta E$  as a function of LA ( $[\text{AlCl}_3]$ ) distances are plotted. The black line shows  $\Delta E$  for the carbonyl-ene reaction ( $\Delta E = E_{(\text{TS1-LA})} - E_{(\text{RC-LA})}$ ), and the red line represents  $\Delta E$  for the [2+2] cycloaddition reaction ( $\Delta E =$

$E_{(\text{TS2-LA})} - E_{(\text{RC-LA})}$ ). The 'd' is the distance between the Al of the LA and the carbonyl oxygen ( $\text{O}_d$ ) of the RC.

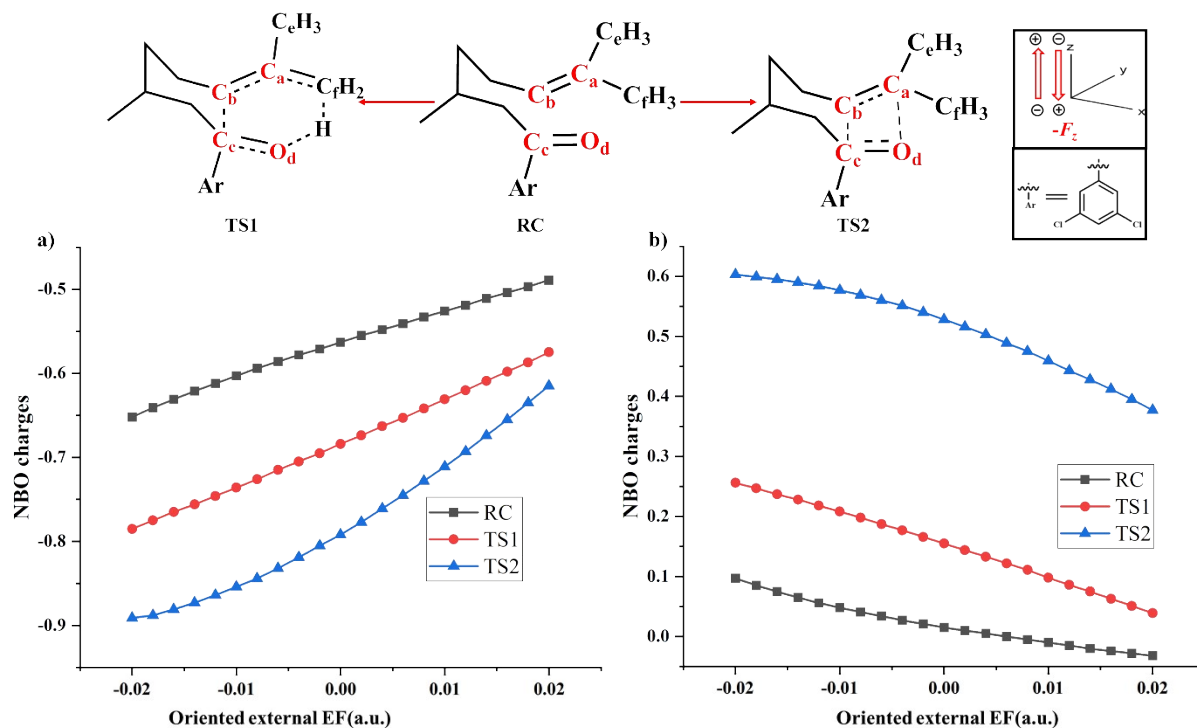

**Fig. S4** The charge difference in atoms in the presence of oriented external EF. **a)** Changes in NBO charges for the  $\text{O}_d$ -atom in the presence of oriented external EF for **RC** (in black), **TS1** (in red), and **TS2** (in blue). **b)** Changes in NBO charges for the  $\text{C}_a$ -atom in the presence of an oriented external EF are shown for **RC** (in black), **TS1** (in red), and **TS2** (in blue).

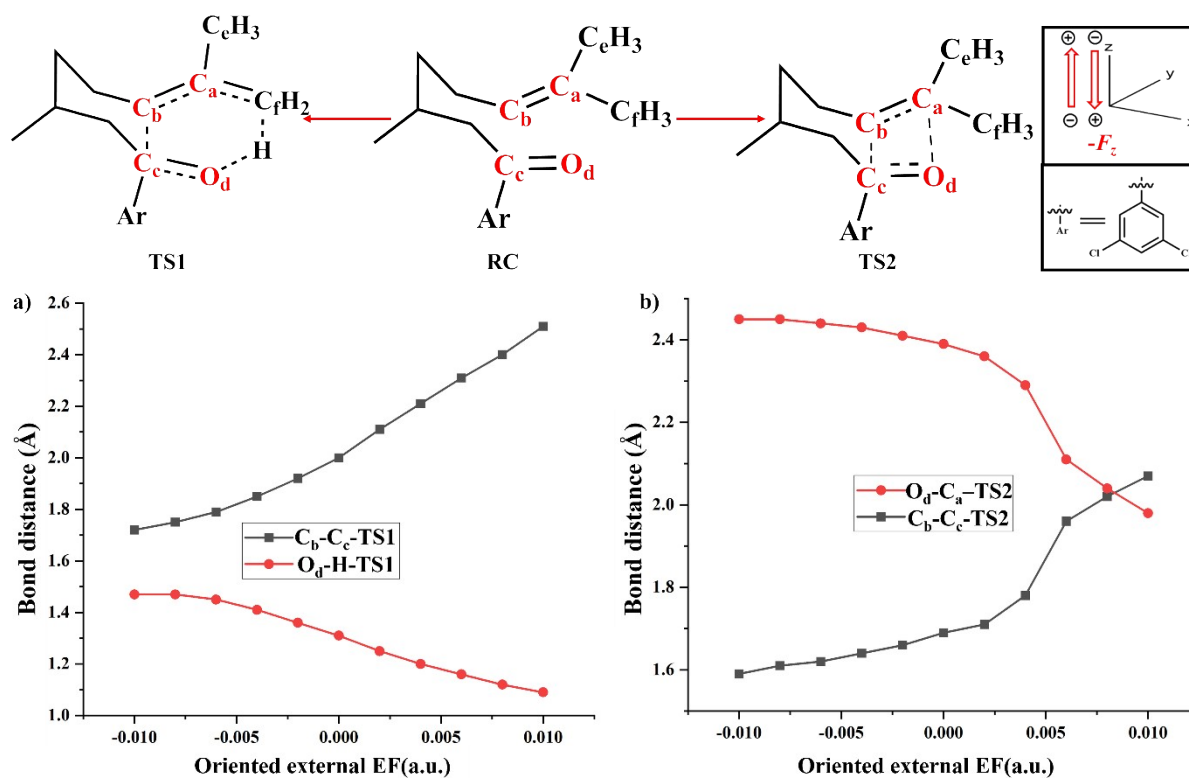

**Fig. S5** The relation between the bond distance and the oriented external EF. **a)** The Change in bond distances in the presence of oriented external EF for **TS1**. The black line represents the bond distance between the  $C_b$ - $C_c$  bond, while the red line shows the bond distance between the  $O_d$ - $H$  bond. **b)** The change in bond distances in the presence of oriented external EF for **TS3**. The black line represents the bond distance between the  $C_b$ - $C_c$ , and the red line shows the bond distance between the  $O_d$ - $C_a$ .

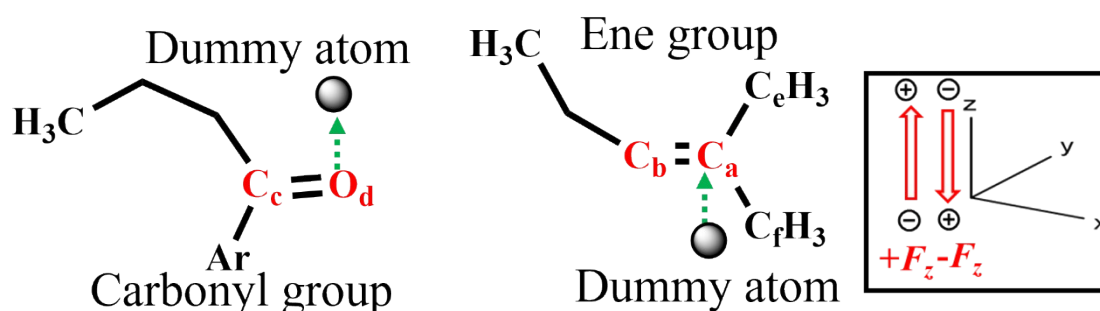

**Fig. S6** Fragmentation of the reactants into carbonyl and ene groups, along with positioning a dummy atom to maintain the direction of the oriented external EFs between these groups, even in the absence of either the carbonyl or ene group.

**Full citation of Gaussian 16:** M. J. Frisch, G. W. Trucks, H. B. Schlegel, G. E. Scuseria, M. A. Robb, J. R. Cheeseman, G. Scalmani, V. Barone, G. A. Petersson, H. Nakatsuji, X. Li, M. Caricato, A.V. Marenich, J. Bloino, B.G. Janesko, R. Gomperts, B. Mennucci, H.P. Hratchian, J.V. Ortiz, A.F. Izmaylov, J.L. Sonnenberg, D. Williams-Young, F. Ding, F. Lipparini, F. Egidi, J. Goings, B. Peng, A. Petrone, T. Henderson, D. Ranasinghe, V.G. Zakrzewski, J. Gao, N. Rega, G. Zheng, W. Liang, M. Hada, M. Ehara, K. Toyota, R. Fukuda, J. Hasegawa, M. Ishida, T. Nakajima, Y. Honda, O. Kitao, H. Nakai, T. Vreven, K. Throssell, Jr., J.A. Montgomery, J.E. Peralta, F. Ogliaro, M.J. Bearpark, J.J. Heyd, E.N. Brothers, K.N. Kudin, V.N. Staroverov, T.A. Keith, R. Kobayashi, J. Normand, K. Raghavachari, A.P. Rendell, J.C. Burant, S.S. Iyengar, J. Tomasi, M. Cossi, J.M. Millam, M. Klene, C. Adamo, R. Cammi, J.W. Ochterski, R.L. Martin, K. Morokuma, O. Farkas, J.B. Foresman and D.J. Fox, *Gaussian 16, Revision A.03*; Gaussian, Inc.: Wallingford, CT, 2016.

### Coordinates of the optimized geometries for the RCCOM reaction

The Cartesian coordinates of the saddle points and their corresponding energies in Hartree calculated at the B1 level of theory using the SMD model with 1,2-dichloroethane as a solvent.

The associated imaginary frequencies are provided in  $\text{cm}^{-1}$

| RC-LA ( $[\text{AlCl}_2]^+[\text{SbF}_6]^-$ ) |           |           |           | I1-LA ( $[\text{AlCl}_2]^+[\text{SbF}_6]^-$ ) |           |           |           |
|-----------------------------------------------|-----------|-----------|-----------|-----------------------------------------------|-----------|-----------|-----------|
| Energy = -3618.0378                           |           |           |           | Energy = -3618.0304                           |           |           |           |
| Imaginary frequency = 0                       |           |           |           | Imaginary frequency = 0                       |           |           |           |
| C                                             | -1.815139 | -0.711479 | -0.514075 | C                                             | -1.947387 | -0.363843 | -0.409936 |
| C                                             | -2.091111 | 0.736950  | -0.513041 | C                                             | -1.399955 | 1.035751  | -0.117529 |
| C                                             | -2.774666 | -1.693974 | -1.113032 | C                                             | -1.272184 | -0.988619 | -1.641656 |
| C                                             | -2.660337 | -3.176656 | -0.705064 | C                                             | -1.844414 | -2.348659 | -2.073584 |
| C                                             | -3.285811 | -3.470661 | 0.670628  | C                                             | -3.361162 | -2.222262 | -2.282015 |
| C                                             | -2.647040 | -2.749081 | 1.873612  | C                                             | -4.043818 | -1.745508 | -0.993338 |
| H                                             | -3.210815 | -4.561771 | 0.839547  | H                                             | -3.782414 | -3.197733 | -2.592278 |
| H                                             | -4.368778 | -3.229770 | 0.626517  | H                                             | -3.557179 | -1.501226 | -3.102942 |
| C                                             | -2.984378 | -1.285141 | 1.969316  | C                                             | -3.512289 | -0.371274 | -0.528933 |

|    |           |           |           |    |           |           |           |
|----|-----------|-----------|-----------|----|-----------|-----------|-----------|
| H  | -1.556249 | -2.913372 | 1.868126  | H  | -3.871488 | -2.498806 | -0.202448 |
| H  | -3.025974 | -3.241639 | 2.795228  | H  | -5.137848 | -1.659086 | -1.127723 |
| C  | -2.188630 | -0.269135 | 2.412303  | C  | -4.146147 | 0.132640  | 0.768313  |
| O  | -0.624194 | -1.081761 | -0.247947 | O  | -1.617390 | -1.257959 | 0.754929  |
| C  | -3.318552 | -4.043747 | -1.789901 | C  | -1.105110 | -2.848109 | -3.319519 |
| H  | -1.591171 | -3.455927 | -0.658899 | H  | -1.678453 | -3.074258 | -1.255160 |
| H  | -3.246310 | -5.115849 | -1.526704 | H  | -1.246436 | -2.144663 | -4.164751 |
| H  | -2.828438 | -3.890294 | -2.770784 | H  | -1.482002 | -3.841364 | -3.631452 |
| H  | -4.391727 | -3.787675 | -1.896050 | H  | -0.018729 | -2.932280 | -3.123053 |
| C  | -1.001432 | 1.632581  | -0.400225 | C  | -0.871556 | 1.394860  | 1.133110  |
| C  | -1.240332 | 3.011797  | -0.432484 | C  | -0.365671 | 2.690559  | 1.326055  |
| C  | -2.541051 | 3.530647  | -0.552684 | C  | -0.389671 | 3.655385  | 0.309721  |
| C  | -3.612379 | 2.622352  | -0.639480 | C  | -0.954311 | 3.283569  | -0.921420 |
| C  | -3.408960 | 1.238399  | -0.630837 | C  | -1.456682 | 1.995713  | -1.146772 |
| H  | 0.014604  | 1.253057  | -0.308515 | H  | -0.840933 | 0.696151  | 1.971722  |
| Cl | 0.108630  | 4.118168  | -0.309089 | Cl | 0.320050  | 3.109718  | 2.883568  |
| Cl | -5.245980 | 3.244260  | -0.740367 | Cl | -1.020607 | 4.463916  | -2.217061 |
| H  | -4.271090 | 0.569408  | -0.679279 | H  | -1.889377 | 1.747665  | -2.120392 |
| C  | -0.731238 | -0.416379 | 2.753551  | C  | -4.484373 | 1.599841  | 0.833046  |
| H  | -0.363592 | -1.454216 | 2.705529  | H  | -4.899128 | 1.880620  | 1.818195  |
| H  | -0.539766 | -0.026398 | 3.774145  | H  | -5.231455 | 1.838983  | 0.048053  |
| H  | -0.119230 | 0.208499  | 2.071418  | H  | -3.599049 | 2.228611  | 0.622295  |
| C  | -2.738997 | 1.121578  | 2.583711  | C  | -4.362208 | -0.695794 | 1.819143  |
| H  | -3.788822 | 1.204118  | 2.250780  | H  | -4.209160 | -1.782902 | 1.759645  |
| H  | -2.122983 | 1.855327  | 2.026339  | H  | -4.771728 | -0.304282 | 2.760927  |
| H  | -2.682889 | 1.420771  | 3.651492  | H  | -1.406138 | -0.273901 | -2.472583 |
| H  | -3.816122 | -1.350488 | -1.013409 | H  | -0.183987 | -1.046517 | -1.471954 |
| H  | -2.532426 | -1.602865 | -2.198354 | Cl | 0.412357  | -3.901189 | 0.461454  |
| Cl | 1.202123  | -2.388592 | -2.500027 | F  | 1.126585  | -0.784429 | 0.696868  |
| F  | 2.057453  | -1.086779 | 0.350340  | F  | 2.981363  | 1.199379  | 1.025421  |
| F  | 1.853106  | 1.520923  | 1.213056  | F  | 3.787373  | -1.361103 | 0.560523  |
| F  | 4.132545  | 0.127285  | 1.698961  | Al | 0.006893  | -2.009975 | 1.316801  |
| Al | 0.818290  | -2.140224 | -0.425223 | Sb | 2.798461  | -0.040115 | -0.437677 |

|                                                                            |           |           |           |                                                                            |           |           |           |
|----------------------------------------------------------------------------|-----------|-----------|-----------|----------------------------------------------------------------------------|-----------|-----------|-----------|
| Sb                                                                         | 3.208879  | 0.694709  | 0.106692  | Cl                                                                         | -0.127281 | -1.876315 | 3.432357  |
| Cl                                                                         | 0.853829  | -3.894953 | 0.785310  | F                                                                          | 2.292860  | -1.413055 | -1.705807 |
| F                                                                          | 4.373052  | -0.411890 | -0.958891 | F                                                                          | 1.519478  | 1.143674  | -1.265312 |
| F                                                                          | 2.079722  | 0.966135  | -1.443661 | F                                                                          | 4.303265  | 0.595158  | -1.446440 |
| F                                                                          | 4.228419  | 2.304143  | -0.137656 | H                                                                          | 0.014299  | 4.659515  | 0.469920  |
| H                                                                          | -2.717987 | 4.610781  | -0.567096 | H                                                                          | -3.716873 | 0.362452  | -1.330098 |
| H                                                                          | -4.031864 | -1.032537 | 1.737945  | H                                                                          | -2.297425 | -1.094089 | 1.466964  |
| <b>I2-LA ([AlCl<sub>2</sub>]<sup>+</sup>[SbF<sub>6</sub>]<sup>-</sup>)</b> |           |           |           | <b>PD-LA ([AlCl<sub>2</sub>]<sup>+</sup>[SbF<sub>6</sub>]<sup>-</sup>)</b> |           |           |           |
| Energy = -3618.0352                                                        |           |           |           | Energy = -3618.0450                                                        |           |           |           |
| Imaginary frequency = 0                                                    |           |           |           | Imaginary frequency = 0                                                    |           |           |           |
| C                                                                          | -1.575851 | 1.134647  | -0.430221 | C                                                                          | 3.528381  | -0.466756 | 0.754572  |
| C                                                                          | -0.329893 | 1.893382  | -0.006500 | C                                                                          | 1.857650  | -2.359676 | 0.540277  |
| C                                                                          | -1.438672 | 0.439955  | -1.782946 | H                                                                          | 2.717754  | -1.650393 | -1.839851 |
| C                                                                          | -2.718516 | -0.287491 | -2.213741 | C                                                                          | 2.237025  | -0.997169 | 0.997816  |
| C                                                                          | -3.905862 | 0.695262  | -2.365106 | C                                                                          | 0.378197  | -2.632211 | 0.319432  |
| C                                                                          | -3.843668 | 1.948509  | -1.446256 | C                                                                          | 0.093040  | -3.878385 | -0.538267 |
| H                                                                          | -4.846997 | 0.139132  | -2.198544 | C                                                                          | 0.950823  | -5.053672 | -0.039755 |
| H                                                                          | -3.939361 | 1.050259  | -3.413374 | C                                                                          | 2.450759  | -4.726251 | -0.142189 |
| C                                                                          | -2.937666 | 1.867822  | -0.209470 | H                                                                          | 0.720915  | -5.972715 | -0.612933 |
| H                                                                          | -4.858706 | 2.236811  | -1.114664 | H                                                                          | 0.686745  | -5.254506 | 1.019424  |
| H                                                                          | -3.462153 | 2.802470  | -2.036381 | C                                                                          | 2.784117  | -3.331821 | 0.325311  |
| C                                                                          | -3.271725 | 0.891562  | 0.952008  | H                                                                          | 2.789852  | -4.833523 | -1.197316 |
| O                                                                          | -1.963988 | 0.120390  | 0.633173  | H                                                                          | 3.054411  | -5.459323 | 0.430933  |
| C                                                                          | -2.472509 | -1.096125 | -3.493043 | C                                                                          | -1.404625 | -4.207582 | -0.540753 |
| H                                                                          | -2.959348 | -1.008140 | -1.413659 | H                                                                          | 0.407927  | -3.649076 | -1.579110 |
| H                                                                          | -3.391545 | -1.629344 | -3.805498 | H                                                                          | -1.621289 | -5.073050 | -1.197634 |
| H                                                                          | -1.671876 | -1.844063 | -3.334835 | H                                                                          | -2.001782 | -3.344631 | -0.889189 |
| H                                                                          | -2.163853 | -0.429065 | -4.323096 | H                                                                          | -1.745157 | -4.461218 | 0.483499  |
| C                                                                          | 0.264197  | 1.713094  | 1.254907  | C                                                                          | 1.283825  | -0.173476 | 1.644334  |
| C                                                                          | 1.444027  | 2.404627  | 1.570671  | C                                                                          | 1.629310  | 1.127686  | 2.038210  |
| C                                                                          | 2.042670  | 3.299415  | 0.672068  | C                                                                          | 2.901207  | 1.670980  | 1.792398  |
| C                                                                          | 1.410014  | 3.492120  | -0.567148 | C                                                                          | 3.834895  | 0.841620  | 1.150031  |

|                                                                             |           |           |           |                                                                             |           |           |           |
|-----------------------------------------------------------------------------|-----------|-----------|-----------|-----------------------------------------------------------------------------|-----------|-----------|-----------|
| C                                                                           | 0.239549  | 2.804946  | -0.918410 | H                                                                           | 0.273811  | -0.540397 | 1.839852  |
| H                                                                           | -0.167242 | 1.041032  | 1.998222  | Cl                                                                          | 0.436623  | 2.109454  | 2.868085  |
| Cl                                                                          | 2.190621  | 2.137240  | 3.134291  | Cl                                                                          | 5.439077  | 1.480985  | 0.804453  |
| Cl                                                                          | 2.119181  | 4.613453  | -1.715254 | H                                                                           | 4.284513  | -1.064528 | 0.238729  |
| H                                                                           | -0.211931 | 2.973270  | -1.900196 | H                                                                           | -0.121055 | -2.746300 | 1.303281  |
| C                                                                           | -3.149241 | 1.508071  | 2.332915  | H                                                                           | -0.095680 | -1.747739 | -0.140148 |
| H                                                                           | -2.238348 | 2.124744  | 2.417492  | H                                                                           | 3.151811  | 2.694422  | 2.086570  |
| H                                                                           | -3.146952 | 0.728139  | 3.114319  | H                                                                           | 3.847383  | -3.117436 | 0.502853  |
| H                                                                           | -4.029266 | 2.161112  | 2.486066  | C                                                                           | 2.467957  | 0.473141  | -2.068615 |
| C                                                                           | -4.459892 | -0.040089 | 0.838525  | O                                                                           | 1.260669  | 0.447559  | -1.693610 |
| H                                                                           | -4.516517 | -0.551460 | -0.133115 | C                                                                           | 3.203373  | 1.750006  | -2.239219 |
| H                                                                           | -5.378614 | 0.559912  | 0.974620  | H                                                                           | 2.623265  | 2.623143  | -1.902286 |
| H                                                                           | -1.186153 | 1.218112  | -2.526747 | H                                                                           | 3.455266  | 1.841231  | -3.317320 |
| H                                                                           | -0.581829 | -0.251592 | -1.753618 | H                                                                           | 4.172399  | 1.689226  | -1.708422 |
| Cl                                                                          | -2.107277 | -3.158932 | 0.185977  | C                                                                           | 3.109070  | -0.812564 | -2.443359 |
| F                                                                           | 0.420006  | -1.209851 | 0.643388  | H                                                                           | 4.208414  | -0.747786 | -2.403866 |
| F                                                                           | 3.117397  | -0.761763 | 0.846676  | H                                                                           | 2.813154  | -0.994070 | -3.500974 |
| F                                                                           | 2.162715  | -3.282790 | 0.427202  | Cl                                                                          | -1.243834 | 1.433095  | -3.324134 |
| Al                                                                          | -1.257049 | -1.490216 | 1.183148  | F                                                                           | -1.050290 | 0.598189  | -0.204298 |
| Sb                                                                          | 2.136941  | -1.630246 | -0.566376 | F                                                                           | -2.751523 | 1.288654  | 1.893381  |
| Cl                                                                          | -1.266565 | -1.552781 | 3.309154  | F                                                                           | -3.524707 | 1.585818  | -0.693032 |
| F                                                                           | 0.839787  | -2.391354 | -1.785498 | Al                                                                          | -0.206850 | 1.538512  | -1.474209 |
| F                                                                           | 1.835444  | 0.099511  | -1.373771 | Sb                                                                          | -3.043592 | 0.082978  | 0.421465  |
| F                                                                           | 3.665904  | -2.050566 | -1.650139 | Cl                                                                          | 0.236648  | 3.459588  | -0.686973 |
| H                                                                           | 2.966078  | 3.828209  | 0.926775  | F                                                                           | -3.008067 | -1.052648 | -1.142213 |
| H                                                                           | -2.786195 | 2.885308  | 0.184902  | F                                                                           | -2.204508 | -1.318037 | 1.454733  |
| H                                                                           | -4.424033 | -0.792214 | 1.649102  | F                                                                           | -4.837629 | -0.386488 | 0.920000  |
| <b>TS1-LA ([AlCl<sub>2</sub>]<sup>+</sup>[SbF<sub>6</sub>]<sup>-</sup>)</b> |           |           |           | <b>TS2-LA ([AlCl<sub>2</sub>]<sup>+</sup>[SbF<sub>6</sub>]<sup>-</sup>)</b> |           |           |           |
| Energy = -3618.0192                                                         |           |           |           | Energy = -3618.0149                                                         |           |           |           |
| Imaginary frequency = -1024.84                                              |           |           |           | Imaginary frequency = -140.66                                               |           |           |           |
| C                                                                           | 1.906596  | 0.900267  | 0.295560  | C                                                                           | -1.638901 | -0.924184 | -0.381698 |
| C                                                                           | 2.271324  | -0.546043 | -0.068818 | C                                                                           | -2.030421 | 0.527895  | -0.055755 |
| C                                                                           | 2.693938  | 1.889433  | -0.591254 | C                                                                           | -0.945630 | -0.900921 | -1.758837 |



|    |           |           |           |    |           |           |           |
|----|-----------|-----------|-----------|----|-----------|-----------|-----------|
| C  | 2.467310  | 3.371042  | -0.258977 | C  | -0.752427 | -2.266384 | -2.428520 |
| C  | 2.849169  | 3.616252  | 1.209939  | C  | -2.129685 | -2.936816 | -2.554557 |
| C  | 2.022542  | 2.723999  | 2.143035  | C  | -2.702715 | -3.208421 | -1.158206 |
| H  | 2.684374  | 4.678533  | 1.473101  | H  | -2.045733 | -3.895297 | -3.101681 |
| H  | 3.931503  | 3.407422  | 1.339474  | H  | -2.805747 | -2.280071 | -3.141394 |
| C  | 2.217893  | 1.219030  | 1.847629  | C  | -2.881698 | -1.928800 | -0.311473 |
| H  | 0.958878  | 2.992627  | 2.016156  | H  | -2.002666 | -3.899656 | -0.659950 |
| H  | 2.285247  | 2.901065  | 3.202443  | H  | -3.681106 | -3.721498 | -1.214851 |
| C  | 1.310913  | 0.299896  | 2.613041  | C  | -2.929171 | -2.151922 | 1.171001  |
| O  | 0.494258  | 1.089927  | 0.142214  | O  | -0.810414 | -1.457274 | 0.638473  |
| C  | 3.253627  | 4.260240  | -1.228344 | C  | -0.041342 | -2.099311 | -3.775897 |
| H  | 1.389092  | 3.606866  | -0.370241 | H  | -0.121033 | -2.895384 | -1.771094 |
| H  | 3.095820  | 5.331072  | -0.995167 | H  | 0.115677  | -3.080175 | -4.265849 |
| H  | 2.935804  | 4.081953  | -2.273939 | H  | 0.944384  | -1.615866 | -3.637791 |
| H  | 4.339659  | 4.049100  | -1.157743 | H  | -0.642457 | -1.466017 | -4.459538 |
| C  | 1.285259  | -1.467228 | -0.459955 | C  | -1.317933 | 1.255615  | 0.909644  |
| C  | 1.653413  | -2.789497 | -0.759889 | C  | -1.624692 | 2.609056  | 1.121366  |
| C  | 2.983933  | -3.226913 | -0.681827 | C  | -2.643423 | 3.261145  | 0.411181  |
| C  | 3.952080  | -2.286894 | -0.287018 | C  | -3.350070 | 2.507872  | -0.543556 |
| C  | 3.616054  | -0.960155 | 0.016918  | C  | -3.054232 | 1.160180  | -0.789520 |
| H  | 0.234730  | -1.182862 | -0.513920 | H  | -0.520444 | 0.789289  | 1.488619  |
| Cl | 0.405601  | -3.925671 | -1.239452 | Cl | -0.696130 | 3.512284  | 2.305495  |
| Cl | 5.627839  | -2.795222 | -0.163642 | Cl | -4.634787 | 3.284421  | -1.455911 |
| H  | 4.395088  | -0.262051 | 0.337587  | H  | -3.613786 | 0.610790  | -1.553985 |
| C  | -0.048329 | 0.585488  | 2.654447  | C  | -3.529092 | -1.134315 | 2.048357  |
| H  | -0.407629 | 1.624629  | 2.674145  | H  | -3.807297 | -0.196347 | 1.549108  |
| H  | -0.736333 | -0.168748 | 3.054704  | H  | -2.883676 | -0.964968 | 2.932209  |
| H  | 0.029443  | 0.666280  | 1.284479  | H  | -4.446149 | -1.620858 | 2.456065  |
| C  | 1.839045  | -1.014200 | 3.079494  | C  | -2.575824 | -3.439868 | 1.790041  |
| H  | 2.620589  | -1.417773 | 2.413130  | H  | -1.680474 | -3.895020 | 1.335301  |
| H  | 1.033489  | -1.752426 | 3.237893  | H  | -3.421476 | -4.120987 | 1.532780  |
| H  | 2.328922  | -0.821814 | 4.059926  | H  | -1.540189 | -0.264765 | -2.441020 |
| H  | 3.767014  | 1.665005  | -0.454343 | H  | 0.017647  | -0.384193 | -1.606603 |

|                                                                             |           |           |           |                                                                             |           |           |           |
|-----------------------------------------------------------------------------|-----------|-----------|-----------|-----------------------------------------------------------------------------|-----------|-----------|-----------|
| H                                                                           | 2.447133  | 1.669465  | -1.644668 | Cl                                                                          | 1.854140  | -3.358790 | 0.281078  |
| Cl                                                                          | 0.082044  | 1.633144  | -3.108539 | F                                                                           | 1.730917  | -0.209269 | 0.910051  |
| F                                                                           | -1.853747 | 0.317361  | -1.022931 | F                                                                           | 2.936819  | 2.236950  | 0.982099  |
| F                                                                           | -3.316219 | -1.994475 | -1.175582 | F                                                                           | 4.349302  | 0.050488  | 0.153426  |
| F                                                                           | -1.663892 | -1.612481 | 0.952185  | Al                                                                          | 0.804449  | -1.745758 | 1.220541  |
| Al                                                                          | -0.657083 | 1.676080  | -1.110875 | Sb                                                                          | 2.787448  | 0.988537  | -0.479493 |
| Sb                                                                          | -3.225758 | -0.705372 | 0.251716  | Cl                                                                          | 0.731265  | -1.890803 | 3.363244  |
| Cl                                                                          | -1.628174 | 3.459611  | -0.469071 | F                                                                           | 2.455088  | -0.453215 | -1.731466 |
| F                                                                           | -2.881815 | 0.761018  | 1.468602  | F                                                                           | 1.072887  | 1.751746  | -0.945269 |
| F                                                                           | -4.577084 | 0.356989  | -0.617979 | F                                                                           | 3.756807  | 2.067309  | -1.743698 |
| F                                                                           | -4.451282 | -1.611941 | 1.420838  | H                                                                           | -2.876038 | 4.315743  | 0.588301  |
| H                                                                           | 3.258968  | -4.259764 | -0.916895 | H                                                                           | -3.794301 | -1.386211 | -0.619806 |
| H                                                                           | 3.273359  | 0.938779  | 2.001906  | H                                                                           | -2.488648 | -3.372760 | 2.886389  |
| <b>TS3-LA ([AlCl<sub>2</sub>]<sup>+</sup>[SbF<sub>6</sub>]<sup>-</sup>)</b> |           |           |           | <b>TS4-LA ([AlCl<sub>2</sub>]<sup>+</sup>[SbF<sub>6</sub>]<sup>-</sup>)</b> |           |           |           |
| Energy = -3618.0049                                                         |           |           |           | Energy = -3618.0154                                                         |           |           |           |
| Imaginary frequency = -681.21                                               |           |           |           | Imaginary frequency = -211.43                                               |           |           |           |
| C                                                                           | -1.868324 | 0.482385  | -0.144310 | C                                                                           | -1.970863 | 1.708735  | 0.492136  |
| C                                                                           | -0.857537 | 1.594906  | 0.169985  | C                                                                           | -3.112260 | 0.808963  | 0.600946  |
| C                                                                           | -1.599529 | -0.173012 | -1.520827 | C                                                                           | -1.034056 | 1.884878  | 1.628310  |
| C                                                                           | -2.763629 | -1.068372 | -1.966332 | C                                                                           | 0.384661  | 2.330212  | 1.230568  |
| C                                                                           | -3.978214 | -0.180980 | -2.334347 | C                                                                           | 0.361353  | 3.598785  | 0.357368  |
| C                                                                           | -3.981499 | 1.166775  | -1.574178 | C                                                                           | -0.831833 | 3.651115  | -0.632666 |
| H                                                                           | -4.914669 | -0.740765 | -2.161628 | H                                                                           | 1.319720  | 3.651057  | -0.188871 |
| H                                                                           | -3.944595 | 0.045925  | -3.417922 | H                                                                           | 0.317558  | 4.488851  | 1.014596  |
| C                                                                           | -3.398026 | 1.133584  | -0.149312 | C                                                                           | -1.671641 | 2.374484  | -0.738925 |
| H                                                                           | -5.000693 | 1.593304  | -1.532300 | H                                                                           | -0.504481 | 3.959008  | -1.638610 |
| H                                                                           | -3.366721 | 1.890769  | -2.136203 | H                                                                           | -1.548548 | 4.426204  | -0.297878 |
| C                                                                           | -4.230045 | 0.482638  | 0.914933  | C                                                                           | -0.898620 | 0.965879  | -1.680464 |
| O                                                                           | -1.797598 | -0.530008 | 0.853028  | O                                                                           | -0.421082 | 0.006413  | -0.825881 |
| C                                                                           | -2.347120 | -1.990368 | -3.117586 | C                                                                           | 1.268918  | 2.512723  | 2.467301  |
| H                                                                           | -3.031809 | -1.704045 | -1.100293 | H                                                                           | 0.796438  | 1.511137  | 0.625069  |
| H                                                                           | -3.196370 | -2.621681 | -3.445696 | H                                                                           | 2.304653  | 2.754708  | 2.163659  |
| H                                                                           | -1.516357 | -2.653408 | -2.810788 | H                                                                           | 1.302327  | 1.590006  | 3.074680  |

|                                |           |           |           |                                |           |           |           |
|--------------------------------|-----------|-----------|-----------|--------------------------------|-----------|-----------|-----------|
| H                              | -2.009117 | -1.393263 | -3.988476 | H                              | 0.889609  | 3.339479  | 3.101658  |
| C                              | -0.135368 | 1.604829  | 1.375169  | C                              | -4.328022 | 1.121806  | -0.062397 |
| C                              | 0.825955  | 2.603361  | 1.599398  | C                              | -5.404777 | 0.232236  | 0.023170  |
| C                              | 1.077399  | 3.615995  | 0.662512  | C                              | -5.298058 | -0.984961 | 0.720929  |
| C                              | 0.313503  | 3.608770  | -0.516879 | C                              | -4.079505 | -1.289887 | 1.356330  |
| C                              | -0.645867 | 2.620440  | -0.773019 | C                              | -2.994139 | -0.406644 | 1.324312  |
| H                              | -0.302893 | 0.845458  | 2.142181  | H                              | -4.436104 | 2.063005  | -0.608187 |
| Cl                             | 1.745378  | 2.577596  | 3.093924  | Cl                             | -6.913206 | 0.630240  | -0.767389 |
| Cl                             | 0.585081  | 4.866401  | -1.711962 | Cl                             | -3.923239 | -2.810088 | 2.204645  |
| H                              | -1.211856 | 2.644912  | -1.708949 | H                              | -2.050338 | -0.689103 | 1.796343  |
| C                              | -3.752473 | 0.555758  | 2.227548  | C                              | 0.218453  | 1.610221  | -2.490185 |
| H                              | -2.826399 | -0.218411 | 1.762550  | H                              | 0.628088  | 0.808536  | -3.138272 |
| H                              | -4.324020 | 0.076963  | 3.035265  | H                              | 1.027046  | 1.975668  | -1.837811 |
| H                              | -3.085614 | 1.387374  | 2.505686  | H                              | -0.148898 | 2.421993  | -3.140211 |
| C                              | -5.361916 | -0.417149 | 0.570486  | C                              | -2.040225 | 0.434685  | -2.538467 |
| H                              | -5.896418 | -0.771414 | 1.467456  | H                              | -1.633558 | -0.394600 | -3.147877 |
| H                              | -4.981020 | -1.283672 | -0.005107 | H                              | -2.442758 | 1.213974  | -3.209100 |
| H                              | -1.424105 | 0.609708  | -2.277904 | H                              | -2.854525 | 0.023784  | -1.917191 |
| H                              | -0.658224 | -0.741500 | -1.451307 | H                              | -1.520096 | 2.689199  | 2.236355  |
| Cl                             | -1.009406 | -3.663066 | 0.164204  | H                              | -1.019913 | 1.003832  | 2.294749  |
| F                              | 0.936194  | -1.173624 | 0.672641  | H                              | -6.142710 | -1.680195 | 0.765970  |
| F                              | 1.718506  | 0.682830  | -1.248680 | H                              | -2.543379 | 2.524836  | -1.390845 |
| F                              | 3.374624  | 0.041201  | 0.805202  | Al                             | 0.470064  | -1.485476 | -0.987233 |
| Al                             | -0.639318 | -1.844525 | 1.214251  | Cl                             | 0.282419  | -2.470211 | -2.893063 |
| Sb                             | 2.583548  | -0.938554 | -0.653843 | Cl                             | 0.152710  | -2.763411 | 0.698978  |
| Cl                             | -0.559632 | -2.006882 | 3.344300  | Sb                             | 3.676265  | -0.124372 | 0.262122  |
| F                              | 3.184704  | -2.604322 | 0.109903  | F                              | 4.856456  | -0.173359 | -1.261645 |
| F                              | 1.510029  | -1.927299 | -1.926672 | F                              | 2.239992  | -0.999306 | -1.014396 |
| F                              | 4.094462  | -0.746225 | -1.827736 | F                              | 3.001436  | 1.581261  | -0.363942 |
| H                              | 1.837275  | 4.382430  | 0.843214  | F                              | 2.259298  | -0.236512 | 1.576356  |
| H                              | -3.251089 | 2.174560  | 0.185457  | F                              | 4.930698  | 0.708608  | 1.460085  |
| H                              | -6.059025 | 0.112657  | -0.108002 | F                              | 4.204814  | -1.921683 | 0.718113  |
| <b>RC-LA(AlCl<sub>3</sub>)</b> |           |           |           | <b>II-LA(AlCl<sub>3</sub>)</b> |           |           |           |

| Energy = -3239.0347     |           |           |           | Energy = -3239.0286     |           |           |           |
|-------------------------|-----------|-----------|-----------|-------------------------|-----------|-----------|-----------|
| Imaginary frequency = 0 |           |           |           | Imaginary frequency = 0 |           |           |           |
| C                       | 0.141114  | -0.585875 | -0.495556 | C                       | 0.262195  | -0.952179 | 0.165261  |
| C                       | -1.278819 | -0.171662 | -0.486397 | C                       | -1.111466 | -0.340971 | -0.125712 |
| C                       | 0.600996  | -1.834539 | -1.187834 | C                       | 0.855386  | -1.650601 | -1.070536 |
| C                       | 1.989674  | -2.389983 | -0.806149 | C                       | 2.167534  | -2.414242 | -0.818585 |
| C                       | 1.972516  | -3.196325 | 0.505449  | C                       | 1.975205  | -3.401692 | 0.342833  |
| C                       | 1.557509  | -2.413656 | 1.767543  | C                       | 1.530652  | -2.665265 | 1.612108  |
| H                       | 2.993931  | -3.593444 | 0.660373  | H                       | 2.920187  | -3.946115 | 0.533201  |
| H                       | 1.306212  | -4.075517 | 0.377658  | H                       | 1.211755  | -4.155733 | 0.057895  |
| C                       | 0.076600  | -2.158801 | 1.870807  | C                       | 0.194331  | -1.919450 | 1.404935  |
| H                       | 2.134759  | -1.474233 | 1.821981  | H                       | 2.318941  | -1.945435 | 1.900913  |
| H                       | 1.861072  | -3.016986 | 2.650588  | H                       | 1.403747  | -3.365822 | 2.458244  |
| C                       | -0.553684 | -1.070385 | 2.394039  | C                       | -0.294810 | -1.171810 | 2.645209  |
| O                       | 0.995861  | 0.263834  | -0.110044 | O                       | 1.200282  | 0.141285  | 0.543116  |
| C                       | 2.519522  | -3.253521 | -1.961589 | C                       | 2.630868  | -3.102820 | -2.107079 |
| H                       | 2.682734  | -1.539068 | -0.672931 | H                       | 2.943177  | -1.687024 | -0.516233 |
| H                       | 3.511210  | -3.674969 | -1.709560 | H                       | 1.873022  | -3.832870 | -2.456992 |
| H                       | 2.620730  | -2.654730 | -2.887381 | H                       | 3.580787  | -3.647318 | -1.941467 |
| H                       | 1.830651  | -4.097150 | -2.168131 | H                       | 2.793501  | -2.363615 | -2.915736 |
| C                       | -1.578237 | 1.185436  | -0.213591 | C                       | -1.412325 | 0.997787  | 0.179587  |
| C                       | -2.913182 | 1.608249  | -0.228440 | C                       | -2.714630 | 1.479731  | -0.033400 |
| C                       | -3.966057 | 0.716344  | -0.496974 | C                       | -3.735063 | 0.665660  | -0.546783 |
| C                       | -3.646170 | -0.629428 | -0.751446 | C                       | -3.411005 | -0.669672 | -0.839984 |
| C                       | -2.322808 | -1.085583 | -0.757293 | C                       | -2.121797 | -1.180775 | -0.636147 |
| H                       | -0.772235 | 1.897193  | -0.013558 | H                       | -0.663331 | 1.675116  | 0.595937  |
| Cl                      | -3.285071 | 3.285794  | 0.104186  | Cl                      | -3.076180 | 3.150687  | 0.357914  |
| Cl                      | -4.943766 | -1.766367 | -1.050691 | Cl                      | -4.660024 | -1.727744 | -1.472130 |
| H                       | -2.119367 | -2.142037 | -0.945923 | H                       | -1.917500 | -2.233649 | -0.851966 |
| C                       | 0.150778  | 0.170832  | 2.869429  | C                       | -1.770034 | -1.249147 | 2.946550  |
| H                       | 1.249770  | 0.088722  | 2.868034  | H                       | -2.039255 | -0.644301 | 3.831631  |
| H                       | -0.182219 | 0.430151  | 3.895229  | H                       | -2.051043 | -2.305856 | 3.137058  |
| H                       | -0.135315 | 1.029712  | 2.225970  | H                       | -2.378018 | -0.916597 | 2.084424  |

|                                |           |           |           |                                |           |           |           |
|--------------------------------|-----------|-----------|-----------|--------------------------------|-----------|-----------|-----------|
| C                              | -2.054978 | -1.033403 | 2.518891  | C                              | 0.552588  | -0.453051 | 3.420277  |
| H                              | -2.535949 | -1.918760 | 2.065728  | H                              | 1.641670  | -0.453739 | 3.269152  |
| H                              | -2.462805 | -0.119805 | 2.042045  | H                              | 0.173347  | 0.116861  | 4.280288  |
| H                              | -2.347994 | -0.981451 | 3.588838  | H                              | 0.099153  | -2.374042 | -1.423212 |
| H                              | -0.162055 | -2.628468 | -1.139234 | H                              | 0.971956  | -0.901770 | -1.875315 |
| H                              | 0.624540  | -1.506385 | -2.253369 | Cl                             | 4.166220  | 0.798747  | -0.673089 |
| Cl                             | 3.069490  | 1.061404  | -2.352599 | Al                             | 2.152413  | 1.493965  | -0.408736 |
| Al                             | 2.496811  | 1.294631  | -0.285312 | Cl                             | 1.985367  | 3.051043  | 1.074460  |
| Cl                             | 3.984930  | 0.591103  | 1.104495  | H                              | -4.745017 | 1.054278  | -0.709769 |
| H                              | -5.006432 | 1.056890  | -0.500402 | H                              | -0.570831 | -2.664202 | 1.119363  |
| H                              | -0.563133 | -2.996252 | 1.547155  | H                              | 1.022580  | 0.379601  | 1.492190  |
| Cl                             | 1.814289  | 3.288625  | 0.188196  | Cl                             | 1.128251  | 1.893820  | -2.247870 |
| <b>I2-LA(AlCl<sub>3</sub>)</b> |           |           |           | <b>PD-LA(AlCl<sub>3</sub>)</b> |           |           |           |
| Energy = -3239.0315            |           |           |           | Energy = -3239.0403            |           |           |           |
| Imaginary frequency = 0        |           |           |           | Imaginary frequency = 0        |           |           |           |
| C                              | -0.066549 | 0.998184  | 0.204815  | C                              | 0.413484  | 2.389185  | -0.402572 |
| C                              | 1.343536  | 0.448860  | 0.074650  | C                              | 2.352484  | 0.923378  | 0.299307  |
| C                              | -0.510467 | 1.844377  | -0.988499 | H                              | 1.747939  | 0.187697  | -2.077128 |
| C                              | -1.915479 | 2.437428  | -0.800950 | C                              | 0.993204  | 1.481833  | 0.518031  |
| C                              | -1.979088 | 3.373778  | 0.433392  | C                              | 2.640657  | -0.456344 | 0.871529  |
| C                              | -0.962855 | 3.044421  | 1.562197  | C                              | 3.854962  | -1.147760 | 0.223744  |
| H                              | -3.012054 | 3.367279  | 0.827598  | C                              | 5.038349  | -0.166280 | 0.163831  |
| H                              | -1.784302 | 4.412363  | 0.101817  | C                              | 4.685649  | 1.073874  | -0.676108 |
| C                              | -0.395870 | 1.618555  | 1.598573  | H                              | 5.935708  | -0.664888 | -0.251122 |
| H                              | -1.396006 | 3.276024  | 2.553222  | H                              | 5.287887  | 0.145102  | 1.199565  |
| H                              | -0.084251 | 3.707091  | 1.451142  | C                              | 3.300889  | 1.602311  | -0.399072 |
| C                              | -1.311680 | 0.404260  | 1.906085  | H                              | 4.754068  | 0.827745  | -1.759889 |
| O                              | -1.055170 | -0.110674 | 0.467285  | H                              | 5.428158  | 1.882321  | -0.516456 |
| C                              | -2.383062 | 3.148579  | -2.076555 | C                              | 4.206030  | -2.443056 | 0.964591  |
| H                              | -2.601368 | 1.588842  | -0.630529 | H                              | 3.574916  | -1.402380 | -0.821007 |
| H                              | -3.392495 | 3.582344  | -1.936026 | H                              | 5.035755  | -2.978863 | 0.462970  |
| H                              | -2.426134 | 2.443620  | -2.929643 | H                              | 3.331974  | -3.121913 | 1.014123  |
| H                              | -1.690831 | 3.972933  | -2.342644 | H                              | 4.521554  | -2.220905 | 2.004272  |

|                                 |           |           |           |                                 |           |           |           |
|---------------------------------|-----------|-----------|-----------|---------------------------------|-----------|-----------|-----------|
| C                               | 1.632686  | -0.920825 | 0.208903  | C                               | 0.229478  | 1.076436  | 1.638769  |
| C                               | 2.964447  | -1.356254 | 0.111969  | C                               | -1.054876 | 1.601060  | 1.839762  |
| C                               | 4.025627  | -0.465128 | -0.108698 | C                               | -1.643648 | 2.501715  | 0.936308  |
| C                               | 3.711825  | 0.899606  | -0.225280 | C                               | -0.881303 | 2.877715  | -0.181065 |
| C                               | 2.392375  | 1.367464  | -0.137978 | H                               | 0.638419  | 0.364542  | 2.360598  |
| H                               | 0.844695  | -1.650809 | 0.403941  | Cl                              | -1.957465 | 1.124479  | 3.266433  |
| Cl                              | 3.311629  | -3.068187 | 0.277315  | Cl                              | -1.588383 | 3.982724  | -1.355199 |
| Cl                              | 5.011914  | 2.049384  | -0.488225 | H                               | 0.965548  | 2.698791  | -1.294431 |
| H                               | 2.187706  | 2.439009  | -0.226580 | H                               | 2.809143  | -0.374487 | 1.967307  |
| C                               | -0.714910 | -0.573694 | 2.902749  | H                               | 1.744267  | -1.091892 | 0.755556  |
| H                               | 0.341632  | -0.790704 | 2.669530  | H                               | -2.656542 | 2.884359  | 1.091599  |
| H                               | -1.290998 | -1.514560 | 2.931947  | H                               | 3.065973  | 2.598346  | -0.801105 |
| H                               | -0.761054 | -0.097942 | 3.900945  | C                               | -0.371681 | -0.141048 | -2.116036 |
| C                               | -2.789689 | 0.632696  | 2.139315  | O                               | -0.365426 | -0.974453 | -1.170400 |
| H                               | -3.249890 | 1.266204  | 1.368034  | C                               | -1.632354 | 0.460230  | -2.622818 |
| H                               | -2.900468 | 1.132529  | 3.119621  | H                               | -2.471415 | 0.330202  | -1.921807 |
| H                               | 0.227111  | 2.661122  | -1.101157 | H                               | -1.862139 | -0.064655 | -3.576510 |
| H                               | -0.456817 | 1.229429  | -1.904355 | H                               | -1.479048 | 1.523373  | -2.877818 |
| Cl                              | -3.926307 | -0.894566 | -0.909157 | C                               | 0.917889  | 0.136662  | -2.804953 |
| Al                              | -1.867775 | -1.439510 | -0.578223 | H                               | 0.868735  | 1.042186  | -3.430236 |
| Cl                              | -1.680109 | -3.229835 | 0.609637  | H                               | 1.111410  | -0.740423 | -3.460401 |
| H                               | 5.058632  | -0.818882 | -0.182843 | Cl                              | -2.006029 | -3.587989 | -1.684285 |
| H                               | 0.484019  | 1.609581  | 2.262317  | Al                              | -1.558138 | -2.067366 | -0.222606 |
| H                               | -3.323254 | -0.333692 | 2.186559  | Cl                              | -3.293484 | -0.938510 | 0.365151  |
| Cl                              | -0.734569 | -1.521301 | -2.405595 | Cl                              | -0.417485 | -2.802606 | 1.447283  |
| <b>TS1-LA(AlCl<sub>3</sub>)</b> |           |           |           | <b>TS2-LA(AlCl<sub>3</sub>)</b> |           |           |           |
| Energy = -3239.0131             |           |           |           | Energy = -3239.0078             |           |           |           |
| Imaginary frequency = -913.85   |           |           |           | Imaginary frequency = -165.94   |           |           |           |
| C                               | 0.253406  | -0.912273 | 0.166799  | C                               | 0.046786  | -0.827385 | 0.080552  |
| C                               | -1.154106 | -0.354787 | -0.110401 | C                               | -1.389939 | -0.285926 | -0.040798 |
| C                               | 0.758515  | -1.755580 | -1.029603 | C                               | 0.355230  | -1.587881 | -1.228239 |
| C                               | 2.089230  | -2.487089 | -0.797829 | C                               | 1.618729  | -2.457649 | -1.203998 |
| C                               | 1.964166  | -3.395264 | 0.434741  | C                               | 1.486169  | -3.458909 | -0.045389 |

|    |           |           |           |    |           |           |           |
|----|-----------|-----------|-----------|----|-----------|-----------|-----------|
| C  | 1.578209  | -2.580934 | 1.674039  | C  | 1.439996  | -2.704958 | 1.288188  |
| H  | 2.923225  | -3.916635 | 0.618972  | H  | 2.345386  | -4.156529 | -0.037618 |
| H  | 1.198482  | -4.175188 | 0.239168  | H  | 0.568123  | -4.066794 | -0.189626 |
| C  | 0.222352  | -1.863760 | 1.495485  | C  | 0.252288  | -1.722877 | 1.390808  |
| H  | 2.372260  | -1.836788 | 1.861727  | H  | 2.391993  | -2.155917 | 1.374714  |
| H  | 1.507678  | -3.226880 | 2.569251  | H  | 1.385743  | -3.403020 | 2.144909  |
| C  | -0.165940 | -0.941149 | 2.602813  | C  | 0.424531  | -0.634298 | 2.408363  |
| O  | 1.150244  | 0.139741  | 0.458933  | O  | 0.942847  | 0.235469  | 0.335988  |
| C  | 2.488536  | -3.266341 | -2.056443 | C  | 1.823364  | -3.142060 | -2.559847 |
| H  | 2.871824  | -1.734017 | -0.587713 | H  | 2.496594  | -1.814088 | -0.996848 |
| H  | 3.451335  | -3.792292 | -1.904997 | H  | 0.956154  | -3.787269 | -2.807869 |
| H  | 2.597928  | -2.588543 | -2.925526 | H  | 1.934201  | -2.391563 | -3.366705 |
| H  | 1.719428  | -4.024656 | -2.307870 | H  | 2.731148  | -3.776593 | -2.549911 |
| C  | -1.438674 | 1.009285  | 0.079366  | C  | -1.612578 | 1.096376  | -0.157668 |
| C  | -2.747400 | 1.478465  | -0.120943 | C  | -2.926838 | 1.571737  | -0.299267 |
| C  | -3.792982 | 0.627636  | -0.509437 | C  | -4.032831 | 0.708325  | -0.325789 |
| C  | -3.485233 | -0.731243 | -0.690963 | C  | -3.781421 | -0.670586 | -0.210092 |
| C  | -2.189233 | -1.230277 | -0.497299 | C  | -2.481532 | -1.176759 | -0.072630 |
| H  | -0.662464 | 1.709387  | 0.397801  | H  | -0.771168 | 1.793125  | -0.115960 |
| Cl | -3.088760 | 3.181944  | 0.130115  | Cl | -3.198465 | 3.302090  | -0.434970 |
| Cl | -4.765785 | -1.834930 | -1.166822 | Cl | -5.140752 | -1.784331 | -0.237112 |
| H  | -1.999841 | -2.299327 | -0.630769 | H  | -2.322209 | -2.256876 | 0.012935  |
| C  | 0.771723  | -0.000709 | 3.043833  | C  | 1.704528  | -0.383469 | 3.086437  |
| H  | 1.833884  | -0.282095 | 3.117467  | H  | 1.688739  | 0.535843  | 3.694447  |
| H  | 0.437635  | 0.785148  | 3.735895  | H  | 2.559283  | -0.396456 | 2.388224  |
| H  | 0.935263  | 0.368563  | 1.785920  | H  | 1.853258  | -1.262842 | 3.756570  |
| C  | -1.594308 | -0.863075 | 3.013858  | C  | -0.752516 | 0.092602  | 2.915302  |
| H  | -2.285395 | -1.063755 | 2.176878  | H  | -1.709042 | -0.200228 | 2.461813  |
| H  | -1.836241 | 0.091278  | 3.513398  | H  | -0.571894 | 1.182939  | 2.827322  |
| H  | -1.746865 | -1.684591 | 3.749676  | H  | -0.776251 | -0.099851 | 4.012026  |
| H  | -0.013043 | -2.511288 | -1.260604 | H  | -0.503079 | -2.244757 | -1.464749 |
| H  | 0.824532  | -1.077257 | -1.899739 | H  | 0.409060  | -0.819454 | -2.021985 |
| Cl | 1.355626  | 1.680213  | -2.411169 | Cl | 2.056804  | 3.133871  | 0.625220  |

|                                 |           |           |           |                                  |           |           |           |
|---------------------------------|-----------|-----------|-----------|----------------------------------|-----------|-----------|-----------|
| Al                              | 2.139177  | 1.387765  | -0.420411 | Al                               | 2.270431  | 1.188682  | -0.331677 |
| Cl                              | 4.209046  | 0.751512  | -0.428302 | Cl                               | 2.171201  | 1.352087  | -2.497835 |
| H                               | -4.808234 | 1.006181  | -0.663413 | H                                | -5.052432 | 1.091557  | -0.431476 |
| H                               | -0.574906 | -2.602813 | 1.308298  | H                                | -0.685517 | -2.267663 | 1.610070  |
| Cl                              | 1.871796  | 3.121218  | 0.859234  | Cl                               | 4.168256  | 0.270524  | 0.260464  |
| <b>TS3-LA(AlCl<sub>3</sub>)</b> |           |           |           | <b>TS4-LA (AlCl<sub>3</sub>)</b> |           |           |           |
| Energy = -3238.9992             |           |           |           | Energy = -3239.0066              |           |           |           |
| Imaginary frequency = -509.34   |           |           |           | Imaginary frequency = -97.38     |           |           |           |
| C                               | 0.254894  | -0.791623 | 0.137543  | C                                | 1.074899  | 1.305899  | 0.198798  |
| C                               | -1.232078 | -0.408546 | 0.048302  | C                                | -0.359126 | 1.309801  | 0.008198  |
| C                               | 0.783043  | -1.471763 | -1.150718 | C                                | 1.694818  | 1.876705  | 1.417222  |
| C                               | 2.132143  | -2.165974 | -0.916019 | C                                | 2.746219  | 2.983627  | 1.033404  |
| C                               | 1.906288  | -3.436299 | -0.059292 | C                                | 3.828747  | 2.367280  | 0.132305  |
| C                               | 0.683282  | -3.307735 | 0.879591  | C                                | 3.231898  | 1.709609  | -1.119463 |
| H                               | 2.823766  | -3.667354 | 0.510922  | H                                | 4.402242  | 1.628756  | 0.718071  |
| H                               | 1.727655  | -4.299041 | -0.730950 | H                                | 4.539238  | 3.158807  | -0.175757 |
| C                               | 0.405319  | -1.891152 | 1.411550  | C                                | 2.008329  | 0.792754  | -0.845278 |
| H                               | 0.772503  | -4.000036 | 1.737713  | H                                | 3.992295  | 1.109497  | -1.651560 |
| H                               | -0.224444 | -3.611597 | 0.329628  | H                                | 2.896159  | 2.496110  | -1.820105 |
| C                               | 1.335571  | -1.352563 | 2.443265  | C                                | 2.341303  | -0.721000 | -0.395922 |
| O                               | 1.031884  | 0.343826  | 0.400226  | O                                | 1.228540  | -1.130989 | 0.377321  |
| C                               | 2.847645  | -2.479295 | -2.233882 | C                                | 2.051094  | 4.202355  | 0.409742  |
| H                               | 2.763599  | -1.455064 | -0.349266 | H                                | 3.209285  | 3.290921  | 1.989046  |
| H                               | 3.797513  | -3.018624 | -2.048260 | H                                | 2.786349  | 5.009147  | 0.226776  |
| H                               | 3.080430  | -1.549451 | -2.786813 | H                                | 1.264485  | 4.595653  | 1.082199  |
| H                               | 2.213908  | -3.119903 | -2.880138 | H                                | 1.571943  | 3.950015  | -0.556786 |
| C                               | -1.661741 | 0.863580  | 0.469419  | C                                | -0.929932 | 1.215015  | -1.294573 |
| C                               | -3.026688 | 1.187200  | 0.414241  | C                                | -2.317705 | 1.227102  | -1.446920 |
| C                               | -3.990378 | 0.276418  | -0.046466 | C                                | -3.177119 | 1.283848  | -0.334435 |
| C                               | -3.538887 | -0.992116 | -0.448165 | C                                | -2.609794 | 1.348409  | 0.952824  |
| C                               | -2.182136 | -1.345983 | -0.405565 | C                                | -1.226969 | 1.380036  | 1.138743  |
| H                               | -0.944761 | 1.600403  | 0.840065  | H                                | -0.302347 | 1.172364  | -2.186194 |
| Cl                              | -3.546348 | 2.782363  | 0.934574  | Cl                               | -3.006658 | 1.153967  | -3.049904 |



|                         |           |           |           |                         |           |           |           |
|-------------------------|-----------|-----------|-----------|-------------------------|-----------|-----------|-----------|
| Cl                      | -4.711656 | -2.166693 | -1.024273 | Cl                      | -3.667916 | 1.395126  | 2.340313  |
| H                       | -1.877899 | -2.349145 | -0.717978 | H                       | -0.825530 | 1.405225  | 2.153609  |
| C                       | 1.011654  | -0.100241 | 2.998932  | C                       | 3.607391  | -0.867001 | 0.457349  |
| H                       | -0.052029 | 0.182993  | 3.052261  | H                       | 3.713837  | -1.941208 | 0.699885  |
| H                       | 1.242199  | 0.367292  | 1.862154  | H                       | 3.540848  | -0.319688 | 1.412943  |
| H                       | 1.674997  | 0.326034  | 3.765129  | H                       | 4.509325  | -0.535953 | -0.087457 |
| C                       | 2.668590  | -1.960296 | 2.684994  | C                       | 2.501524  | -1.554472 | -1.677440 |
| H                       | 2.562163  | -3.053675 | 2.821652  | H                       | 2.717887  | -2.604384 | -1.405178 |
| H                       | 3.182284  | -1.506888 | 3.548877  | H                       | 3.334732  | -1.168617 | -2.294559 |
| H                       | 0.053247  | -2.208910 | -1.525782 | H                       | 1.568866  | -1.526817 | -2.268770 |
| H                       | 0.856283  | -0.682034 | -1.920420 | H                       | 0.961704  | 2.292292  | 2.122761  |
| H                       | -5.050841 | 0.543015  | -0.091036 | H                       | 2.251814  | 1.063526  | 1.920744  |
| H                       | -0.593567 | -1.881069 | 1.879288  | H                       | -4.264200 | 1.272656  | -0.465315 |
| H                       | 3.290978  | -1.829760 | 1.776742  | H                       | 1.467701  | 0.668202  | -1.792230 |
| Al                      | 1.684517  | 1.747690  | -0.531875 | Al                      | 0.001468  | -2.388901 | 0.302737  |
| Cl                      | 1.655780  | 3.326467  | 0.959051  | Cl                      | -1.305299 | -2.033596 | 2.017592  |
| Cl                      | 0.425065  | 2.178371  | -2.237436 | Cl                      | 0.921628  | -4.366908 | 0.447251  |
| Cl                      | 3.716517  | 1.291291  | -1.145305 | Cl                      | -1.175727 | -2.270512 | -1.542523 |
| <b>RC</b>               |           |           |           | <b>II</b>               |           |           |           |
| Energy = -1616.1686     |           |           |           | Energy = -1616.1663     |           |           |           |
| Imaginary frequency = 0 |           |           |           | Imaginary frequency = 0 |           |           |           |
| C                       | -1.079529 | -0.038513 | -1.142055 | C                       | -1.140147 | -0.254202 | -0.452015 |
| C                       | 0.370819  | 0.219121  | -0.781796 | C                       | 0.372353  | 0.031409  | -0.376334 |
| C                       | -2.101487 | 1.062503  | -0.873408 | C                       | -1.849198 | 0.936166  | -1.143311 |
| C                       | -3.575389 | 0.610923  | -0.911928 | C                       | -3.381835 | 0.805611  | -1.178970 |
| C                       | -4.055911 | 0.006090  | 0.425589  | C                       | -3.917264 | 0.619820  | 0.251473  |
| C                       | -3.234168 | -1.170700 | 0.996431  | C                       | -3.267006 | -0.587787 | 0.939720  |
| H                       | -5.101842 | -0.329367 | 0.281154  | H                       | -5.018415 | 0.497574  | 0.229439  |
| H                       | -4.091416 | 0.816275  | 1.185570  | H                       | -3.703743 | 1.540767  | 0.835057  |
| C                       | -1.950042 | -0.747853 | 1.668836  | C                       | -1.729305 | -0.456444 | 1.005363  |
| H                       | -3.039215 | -1.914083 | 0.201182  | H                       | -3.527949 | -1.503023 | 0.376832  |
| H                       | -3.871641 | -1.683942 | 1.749773  | H                       | -3.655903 | -0.712750 | 1.968419  |
| C                       | -0.773668 | -1.418277 | 1.727589  | C                       | -1.050887 | -1.620511 | 1.722608  |

|                         |           |           |           |                         |           |           |           |
|-------------------------|-----------|-----------|-----------|-------------------------|-----------|-----------|-----------|
| O                       | -1.386638 | -1.078314 | -1.714902 | O                       | -1.409180 | -1.398413 | -1.253121 |
| C                       | -4.482354 | 1.790003  | -1.301813 | C                       | -4.014218 | 2.015884  | -1.876981 |
| H                       | -3.659760 | -0.171256 | -1.690937 | H                       | -3.625873 | -0.109493 | -1.753956 |
| H                       | -5.545317 | 1.479837  | -1.332071 | H                       | -3.781088 | 2.949575  | -1.325261 |
| H                       | -4.209871 | 2.192212  | -2.297425 | H                       | -5.116699 | 1.916533  | -1.925590 |
| H                       | -4.391608 | 2.614280  | -0.565048 | H                       | -3.631538 | 2.128639  | -2.910708 |
| C                       | 1.310023  | -0.783702 | -1.101904 | C                       | 1.297435  | -0.843994 | -0.971484 |
| C                       | 2.655777  | -0.604688 | -0.763271 | C                       | 2.673408  | -0.585944 | -0.854224 |
| C                       | 3.108986  | 0.563201  | -0.124848 | C                       | 3.165785  | 0.532254  | -0.164400 |
| C                       | 2.159504  | 1.554832  | 0.173042  | C                       | 2.221589  | 1.400010  | 0.412482  |
| C                       | 0.801418  | 1.401219  | -0.144208 | C                       | 0.843382  | 1.166652  | 0.316199  |
| H                       | 0.967382  | -1.693398 | -1.603407 | H                       | 0.946050  | -1.720124 | -1.523574 |
| Cl                      | 3.810317  | -1.878636 | -1.124814 | Cl                      | 3.818295  | -1.696940 | -1.595296 |
| Cl                      | 2.690475  | 3.021279  | 0.981865  | Cl                      | 2.795010  | 2.812858  | 1.289864  |
| H                       | 0.097843  | 2.195659  | 0.116952  | H                       | 0.141093  | 1.856459  | 0.794224  |
| C                       | -0.527369 | -2.761109 | 1.085704  | C                       | 0.079565  | -1.274947 | 2.662692  |
| H                       | -1.324968 | -3.063086 | 0.386109  | H                       | 0.482999  | -2.173363 | 3.166276  |
| H                       | -0.437626 | -3.546828 | 1.866359  | H                       | -0.271876 | -0.560020 | 3.435341  |
| H                       | 0.437511  | -2.755951 | 0.540304  | H                       | 0.905758  | -0.769713 | 2.126475  |
| C                       | 0.406708  | -0.859884 | 2.487031  | C                       | -1.423414 | -2.904837 | 1.518252  |
| H                       | 0.188552  | 0.129403  | 2.931106  | H                       | -2.268708 | -3.174066 | 0.870245  |
| H                       | 1.285740  | -0.759759 | 1.819055  | H                       | -0.899277 | -3.728238 | 2.025377  |
| H                       | 0.712455  | -1.550965 | 3.301755  | H                       | -1.583053 | 1.864165  | -0.603040 |
| H                       | -1.884366 | 1.578940  | 0.078402  | H                       | -1.443283 | 1.023820  | -2.169712 |
| H                       | -1.914432 | 1.814915  | -1.671066 | H                       | 4.240022  | 0.723011  | -0.079412 |
| H                       | 4.163598  | 0.692427  | 0.137662  | H                       | -1.494958 | 0.473052  | 1.557017  |
| H                       | -2.001277 | 0.217277  | 2.199978  | H                       | -1.127755 | -2.180961 | -0.742559 |
| <b>I2</b>               |           |           |           | <b>PD</b>               |           |           |           |
| Energy = -1616.1583     |           |           |           | Energy = -1616.1741     |           |           |           |
| Imaginary frequency = 0 |           |           |           | Imaginary frequency = 0 |           |           |           |
| C                       | -0.928715 | 0.088425  | 0.194028  | C                       | -0.994506 | -1.586332 | 0.001788  |
| C                       | 0.588410  | -0.017493 | 0.145643  | C                       | 1.372903  | -0.819206 | -0.494051 |
| C                       | -1.510171 | -0.860245 | 1.257128  | H                       | 1.832846  | 1.101316  | 2.708760  |

|    |           |           |           |    |           |           |           |
|----|-----------|-----------|-----------|----|-----------|-----------|-----------|
| C  | -3.045788 | -0.827989 | 1.264823  | C  | -0.103012 | -0.631336 | -0.549108 |
| C  | -3.634227 | -1.297107 | -0.091424 | C  | 2.248723  | 0.421413  | -0.611479 |
| C  | -2.746561 | -1.023261 | -1.342249 | C  | 3.687287  | 0.208291  | -0.102775 |
| H  | -4.630646 | -0.832385 | -0.217316 | C  | 4.261726  | -1.088699 | -0.697204 |
| H  | -3.812837 | -2.389603 | -0.038022 | C  | 3.417002  | -2.305974 | -0.282346 |
| C  | -1.634625 | 0.024660  | -1.197726 | H  | 5.313566  | -1.228718 | -0.380461 |
| H  | -3.382201 | -0.751671 | -2.207144 | H  | 4.263717  | -0.996527 | -1.803433 |
| H  | -2.241249 | -1.966979 | -1.623682 | C  | 1.932636  | -2.050212 | -0.353403 |
| C  | -1.958392 | 1.529076  | -0.949558 | H  | 3.670623  | -2.603715 | 0.760107  |
| O  | -1.382894 | 1.452156  | 0.405686  | H  | 3.668269  | -3.190012 | -0.903619 |
| C  | -3.622294 | -1.640077 | 2.431514  | C  | 4.562724  | 1.428139  | -0.411441 |
| H  | -3.324198 | 0.231890  | 1.414189  | H  | 3.633345  | 0.080292  | 0.999275  |
| H  | -4.730082 | -1.604383 | 2.430882  | H  | 5.583428  | 1.303179  | 0.000733  |
| H  | -3.266230 | -1.250415 | 3.405721  | H  | 4.126072  | 2.351408  | 0.018365  |
| H  | -3.318003 | -2.704098 | 2.356541  | H  | 4.652179  | 1.573676  | -1.507320 |
| C  | 1.399411  | 1.042497  | 0.587758  | C  | -0.650637 | 0.537443  | -1.130909 |
| C  | 2.796034  | 0.903521  | 0.541099  | C  | -2.040481 | 0.715861  | -1.175590 |
| C  | 3.413599  | -0.263649 | 0.062874  | C  | -2.935037 | -0.231320 | -0.655757 |
| C  | 2.577798  | -1.306830 | -0.374650 | C  | -2.376863 | -1.378411 | -0.064997 |
| C  | 1.179996  | -1.201678 | -0.339118 | H  | 0.001608  | 1.310121  | -1.545132 |
| H  | 0.933604  | 1.963636  | 0.949686  | Cl | -2.688730 | 2.192870  | -1.876886 |
| Cl | 3.808735  | 2.232740  | 1.091922  | Cl | -3.457042 | -2.568684 | 0.651886  |
| Cl | 3.315477  | -2.780901 | -0.989703 | H  | -0.610133 | -2.478323 | 0.505135  |
| H  | 0.554532  | -2.029607 | -0.690486 | H  | 2.284723  | 0.743811  | -1.675066 |
| C  | -1.126675 | 2.477187  | -1.816016 | H  | 1.784560  | 1.260021  | -0.061258 |
| H  | -0.064467 | 2.170458  | -1.821038 | H  | -4.017070 | -0.072097 | -0.684675 |
| H  | -1.196782 | 3.511374  | -1.425861 | H  | 1.285512  | -2.936135 | -0.285946 |
| H  | -1.501567 | 2.468676  | -2.858256 | C  | -0.101407 | 1.770437  | 1.985431  |
| C  | -3.419575 | 1.962217  | -0.912006 | O  | 0.355851  | 2.708166  | 1.345039  |
| H  | -4.035238 | 1.290935  | -0.292377 | C  | -1.594687 | 1.558161  | 2.150168  |
| H  | -3.835780 | 1.975615  | -1.937366 | H  | -2.159159 | 2.245320  | 1.497214  |
| H  | -1.144012 | -1.886522 | 1.055348  | H  | -1.867991 | 1.740350  | 3.210089  |
| H  | -1.112883 | -0.556828 | 2.245958  | H  | -1.860622 | 0.507398  | 1.927306  |

|                                |           |           |           |                               |           |           |           |
|--------------------------------|-----------|-----------|-----------|-------------------------------|-----------|-----------|-----------|
| H                              | 4.503398  | -0.357148 | 0.027707  | C                             | 0.791515  | 0.738836  | 2.653890  |
| H                              | -0.922542 | -0.104435 | -2.031335 | H                             | 0.764518  | -0.189577 | 2.049454  |
| H                              | -3.490610 | 2.987465  | -0.499096 | H                             | 0.414002  | 0.479174  | 3.661867  |
| <b>TS1</b>                     |           |           |           | <b>TS2</b>                    |           |           |           |
| Energy = -1616.1234            |           |           |           | Energy = -1616.0895           |           |           |           |
| Imaginary frequency = -1187.45 |           |           |           | Imaginary frequency = -717.84 |           |           |           |
| C                              | -1.117178 | -0.279675 | -0.602699 | C                             | 1.094397  | -0.282898 | 0.473432  |
| C                              | 0.363267  | 0.075424  | -0.464159 | C                             | -0.417219 | 0.033153  | 0.288276  |
| C                              | -1.989298 | 0.899158  | -1.081504 | C                             | 1.710325  | 0.927091  | 1.240436  |
| C                              | -3.505064 | 0.670523  | -1.018386 | C                             | 3.242459  | 0.994046  | 1.173223  |
| C                              | -3.955961 | 0.532805  | 0.443740  | C                             | 3.670692  | 1.112489  | -0.299553 |
| C                              | -3.257369 | -0.632264 | 1.153890  | C                             | 3.269974  | -0.140671 | -1.088868 |
| H                              | -5.052328 | 0.378128  | 0.480794  | H                             | 4.767878  | 1.250940  | -0.370041 |
| H                              | -3.745419 | 1.483736  | 0.978013  | H                             | 3.200876  | 2.017740  | -0.740735 |
| C                              | -1.748881 | -0.460288 | 1.296099  | C                             | 1.751553  | -0.400023 | -1.088785 |
| H                              | -3.476692 | -1.559269 | 0.595708  | H                             | 3.801158  | -0.996555 | -0.638142 |
| H                              | -3.678872 | -0.760465 | 2.172414  | H                             | 3.615190  | -0.065795 | -2.139519 |
| C                              | -0.920348 | -1.576418 | 1.618690  | C                             | 1.317705  | -1.786096 | -1.323041 |
| O                              | -1.371775 | -1.434495 | -1.167422 | O                             | 1.339265  | -1.468627 | 1.049853  |
| C                              | -4.249471 | 1.806614  | -1.732469 | C                             | 3.782772  | 2.150362  | 2.023674  |
| H                              | -3.721124 | -0.285318 | -1.535999 | H                             | 3.637411  | 0.035294  | 1.568020  |
| H                              | -5.345120 | 1.645715  | -1.700397 | H                             | 3.403911  | 3.121996  | 1.645218  |
| H                              | -3.941734 | 1.883355  | -2.793975 | H                             | 3.463299  | 2.052911  | 3.080315  |
| H                              | -4.035166 | 2.780205  | -1.245999 | H                             | 4.890334  | 2.185303  | 1.998756  |
| C                              | 1.322981  | -0.860334 | -0.896289 | C                             | -1.344445 | -0.836280 | 0.887803  |
| C                              | 2.688097  | -0.582332 | -0.733762 | C                             | -2.718115 | -0.581936 | 0.756933  |
| C                              | 3.140747  | 0.613372  | -0.154350 | C                             | -3.206692 | 0.524736  | 0.044622  |
| C                              | 2.165142  | 1.535479  | 0.264516  | C                             | -2.257718 | 1.385762  | -0.537784 |
| C                              | 0.793961  | 1.286759  | 0.118160  | C                             | -0.879708 | 1.157918  | -0.424275 |
| H                              | 0.989049  | -1.798528 | -1.349112 | H                             | -0.960941 | -1.702819 | 1.436021  |
| Cl                             | 3.874100  | -1.771721 | -1.259799 | Cl                            | -3.873278 | -1.687178 | 1.500139  |
| Cl                             | 2.690151  | 3.041786  | 1.009455  | Cl                            | -2.831103 | 2.788547  | -1.439399 |
| H                              | 0.070926  | 2.022040  | 0.483165  | H                             | -0.171182 | 1.845861  | -0.898644 |

|                               |           |           |           |                               |           |           |           |
|-------------------------------|-----------|-----------|-----------|-------------------------------|-----------|-----------|-----------|
| C                             | -1.204733 | -2.832576 | 1.013440  | C                             | 2.249516  | -2.929140 | -1.203501 |
| H                             | -2.248668 | -3.183754 | 0.990304  | H                             | 1.730200  | -3.901778 | -1.255036 |
| H                             | -0.467158 | -3.637666 | 1.165007  | H                             | 2.821864  | -2.830974 | -0.263585 |
| H                             | -1.180328 | -2.324054 | -0.222580 | H                             | 2.982580  | -2.860427 | -2.038725 |
| C                             | 0.410939  | -1.362258 | 2.286616  | C                             | -0.019341 | -2.054907 | -1.903218 |
| H                             | 0.681129  | -0.294741 | 2.355863  | H                             | -0.673779 | -1.171893 | -1.950811 |
| H                             | 1.215460  | -1.911518 | 1.761032  | H                             | -0.516014 | -2.898191 | -1.386822 |
| H                             | 0.360780  | -1.773057 | 3.317422  | H                             | 0.172183  | -2.408560 | -2.943040 |
| H                             | -1.745038 | 1.812065  | -0.509595 | H                             | 1.304041  | 1.889464  | 0.869517  |
| H                             | -1.680288 | 1.086311  | -2.130800 | H                             | 1.372049  | 0.805460  | 2.290119  |
| H                             | 4.208467  | 0.819179  | -0.031009 | H                             | -4.280298 | 0.713139  | -0.053388 |
| H                             | -1.446925 | 0.498546  | 1.745776  | H                             | 1.222674  | 0.303000  | -1.757142 |
| <b>TS3</b>                    |           |           |           | <b>TS4</b>                    |           |           |           |
| Energy = -1616.0787           |           |           |           | Energy = -1616.0829           |           |           |           |
| Imaginary frequency = -792.04 |           |           |           | Imaginary frequency = -668.42 |           |           |           |
| C                             | 0.897343  | -0.372449 | 0.284822  | C                             | -0.939333 | -0.350525 | -0.062775 |
| C                             | -0.624363 | -0.118982 | 0.167050  | C                             | 0.512652  | -0.187796 | -0.070917 |
| C                             | 1.446391  | 0.621854  | 1.369037  | C                             | -1.564518 | -1.693241 | 0.046331  |
| C                             | 2.976810  | 0.665756  | 1.385966  | C                             | -2.670748 | -1.977483 | -1.004894 |
| C                             | 3.477203  | 1.419912  | 0.130396  | C                             | -3.734036 | -0.870024 | -0.913738 |
| C                             | 2.533749  | 1.269753  | -1.092413 | C                             | -3.111288 | 0.513453  | -1.132841 |
| H                             | 4.506411  | 1.096141  | -0.116728 | H                             | -4.206839 | -0.918537 | 0.085753  |
| H                             | 3.548556  | 2.499593  | 0.371455  | H                             | -4.530164 | -1.044132 | -1.664425 |
| C                             | 1.655260  | 0.004791  | -1.139815 | C                             | -1.869244 | 0.806951  | -0.253308 |
| H                             | 3.109097  | 1.354940  | -2.034941 | H                             | -3.858824 | 1.308817  | -0.961501 |
| H                             | 1.822154  | 2.115400  | -1.091166 | H                             | -2.800636 | 0.601466  | -2.192240 |
| C                             | 2.317455  | -1.299757 | -1.428787 | C                             | -2.135935 | 1.157392  | 1.339881  |
| O                             | 1.193789  | -1.666811 | 0.600520  | O                             | -1.770286 | 0.071747  | 2.083195  |
| C                             | 3.530668  | 1.283910  | 2.675569  | C                             | -2.076033 | -2.135921 | -2.413431 |
| H                             | 3.310354  | -0.389308 | 1.335222  | H                             | -3.138276 | -2.938065 | -0.715224 |
| H                             | 4.638265  | 1.331736  | 2.652824  | H                             | -2.867248 | -2.369874 | -3.152819 |
| H                             | 3.229918  | 0.693121  | 3.563311  | H                             | -1.329917 | -2.954154 | -2.435045 |
| H                             | 3.150500  | 2.317633  | 2.808166  | H                             | -1.564311 | -1.209213 | -2.739070 |

|    |           |           |           |    |           |           |           |
|----|-----------|-----------|-----------|----|-----------|-----------|-----------|
| C  | -1.518810 | -1.133389 | 0.550410  | C  | 1.124135  | 0.935174  | -0.693130 |
| C  | -2.901322 | -0.907282 | 0.462683  | C  | 2.519218  | 1.050734  | -0.712017 |
| C  | -3.430158 | 0.304450  | -0.010843 | C  | 3.353331  | 0.095170  | -0.107604 |
| C  | -2.514523 | 1.302608  | -0.392374 | C  | 2.737577  | -1.007005 | 0.517483  |
| C  | -1.128864 | 1.111236  | -0.304890 | C  | 1.350640  | -1.167995 | 0.533772  |
| H  | -1.109198 | -2.083180 | 0.909482  | H  | 0.521557  | 1.702798  | -1.183837 |
| Cl | -4.015677 | -2.183046 | 0.952446  | Cl | 3.252844  | 2.431678  | -1.507992 |
| Cl | -3.138829 | 2.836591  | -0.996785 | Cl | 3.752093  | -2.209420 | 1.294059  |
| H  | -0.444004 | 1.912586  | -0.603217 | H  | 0.916091  | -2.027182 | 1.050913  |
| C  | 1.476781  | -2.349829 | -1.991804 | C  | -3.580661 | 1.598563  | 1.647615  |
| H  | 0.702314  | -1.977624 | -2.685736 | H  | -3.652535 | 1.813616  | 2.732319  |
| H  | 0.944527  | -2.579948 | -1.002666 | H  | -4.295390 | 0.788558  | 1.413465  |
| H  | 2.019164  | -3.235785 | -2.363035 | H  | -3.874142 | 2.509163  | 1.088463  |
| C  | 3.763742  | -1.552307 | -1.255205 | C  | -1.181288 | 2.350281  | 1.640142  |
| H  | 4.236335  | -0.956453 | -0.463005 | H  | -1.269563 | 2.595849  | 2.716435  |
| H  | 4.231928  | -1.250226 | -2.222322 | H  | -1.434211 | 3.244719  | 1.036788  |
| H  | 1.045544  | 1.644689  | 1.223846  | H  | -0.131432 | 2.068419  | 1.439572  |
| H  | 1.051360  | 0.236393  | 2.328854  | H  | -0.828390 | -2.512648 | 0.066472  |
| H  | -4.510076 | 0.466946  | -0.083820 | H  | -2.063211 | -1.595156 | 1.046619  |
| H  | 0.877739  | 0.155604  | -1.909762 | H  | 4.442277  | 0.203819  | -0.121379 |
| H  | 3.971222  | -2.629681 | -1.125979 | H  | -1.363289 | 1.672995  | -0.703367 |
